# Supplementary material for: Comprehensive multi-attribute method workflow for biotherapeutic characterization and current good manufacturing practices testing
Source: Springer Nature journal article supplement (doi:10.1038/s41596-022-00785-5), 2022-12-16
Supplement: MOESM1 [file 41596_2022_785_MOESM1_ESM26.pdf]

## Supplementary information

---

# Comprehensive multi-attribute method workflow for biotherapeutic characterization and current good manufacturing practices testing

---

In the format provided by the authors and unedited

## **Comprehensive multi-attribute method (MAM) workflow for biotherapeutic characterization and cGMP testing**

Silvia Millán-Martín<sup>1</sup>, Craig Jakes<sup>1,2</sup>, Sara Carillo<sup>1</sup>, Richard Rogers<sup>3</sup>, Da Ren<sup>4</sup>, Jonathan Bones<sup>1,2</sup>

<sup>1</sup>National Institute for Bioprocessing Research and Training, Foster Avenue, Mount Merrion, Co., Dublin, A94 X099 Ireland

<sup>2</sup>School of Chemical and Bioprocess Engineering, University College Dublin, Belfield, Dublin 4, D04 V1W8, Ireland

<sup>3</sup>Umoja Biopharma, Seattle, WA USA

<sup>4</sup>Amgen Inc., Process Development, Thousand Oaks, CA 91320, USA

\*To whom correspondence should be addressed, email: Jonathan.bones@nibr.ie,

tel: +35312158100, fax: +35312158116

|                        |                                                                                                                                                                                      |
|------------------------|--------------------------------------------------------------------------------------------------------------------------------------------------------------------------------------|
| Supplementary Figure 1 | Sequence coverage map of NISTmAb obtained using (a) in-solution tryptic digestion or (b) automated digestion                                                                         |
| Supplementary Figure 2 | Sequence coverage map of a chimeric IgG1 DP obtained using (a) in-solution tryptic digestion or (b) automated digestion                                                              |
| Supplementary Figure 3 | BioPharma Finder software dashboard showing the created target peptide workbook during MAM discovery phase for chimeric IgG1 DP                                                      |
| Supplementary Figure 4 | Chromeleon CDS properties component window for unmodified peptide WQQGNVFSC[Carboxymethylation]SVMHEALHNHYTQK, which is selected as a reference component to monitor M431+oxidation. |
| Supplementary Table 1  | Summary of PTMs identified and quantified for NIST mAb for in-solution and automated trypsin digestion                                                                               |

Supplementary Figure 1. Sequence coverage map of NISTmAb obtained using (a) in-solution tryptic digestion or (b) automated digestion. The coloured bars show the identified peptides, with the numbers in the bars reflecting the retention time. The different colors indicate the peptide recovery in the MS1 scan: red >50%, orange >20% and yellow >10% represent good recovery. Green, >5%, light blue >2% and cyan >1% represent fair recovery and grey-white scale shows poor recovered peptides.

a)

NISTmAb HC

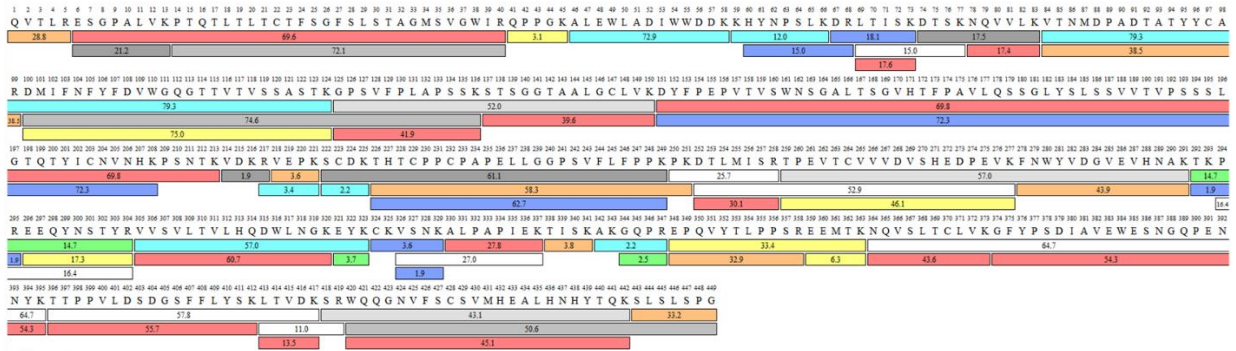

NISTmAb LC

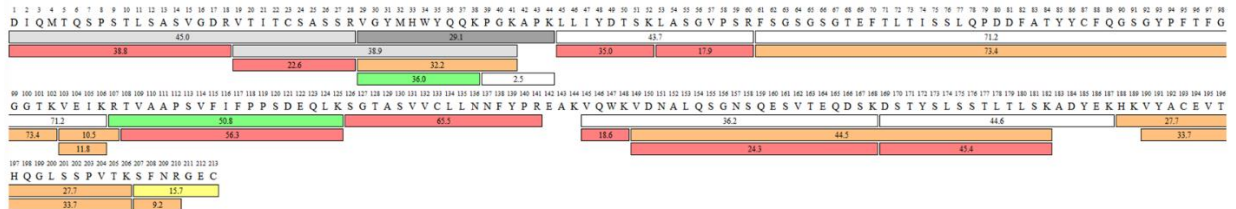

b)

NISTmAb heavy chain

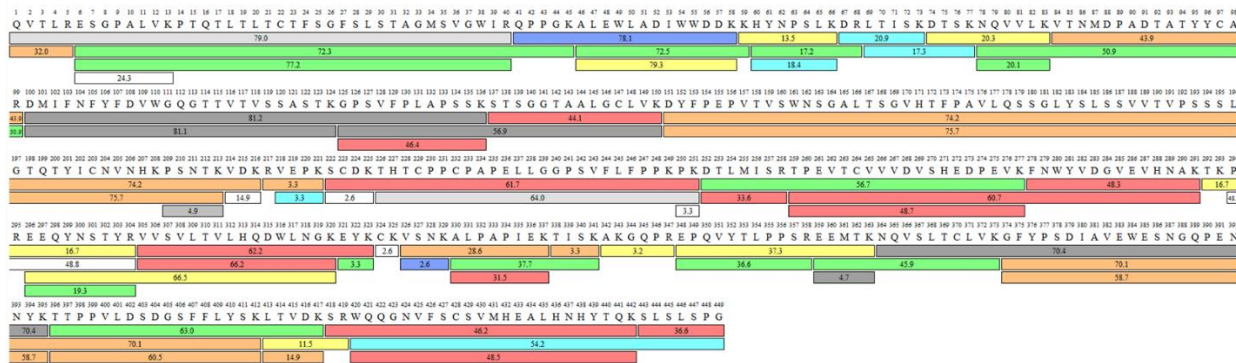

NISTmAb light chain

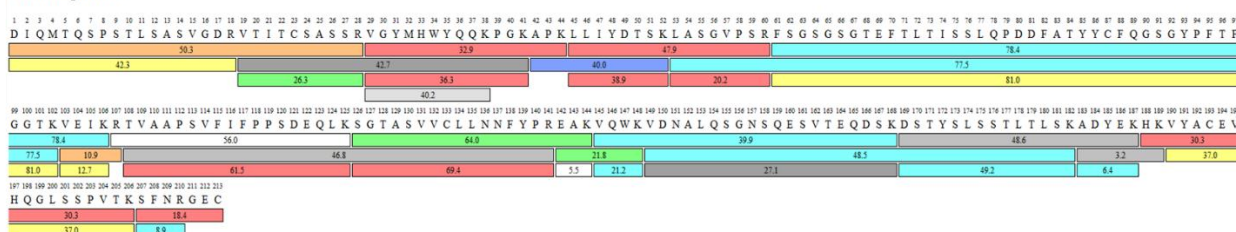

Supplementary Figure 2. Sequence coverage map of chimeric IgG1 DP obtained using (a) in-solution tryptic digestion or (b) automated digestion. The coloured bars show the identified peptides, with the numbers in the bars reflecting the retention time. The different colors indicate the peptide recovery in the MS1 scan: red >50%, orange >20% and yellow >10% represent good recovery. Green, >5%, light blue >2% and cyan >1% represent fair recovery and grey-white scale shows poor recovered peptides.

a)

Chimeric IgG1 DP Heavy Chain

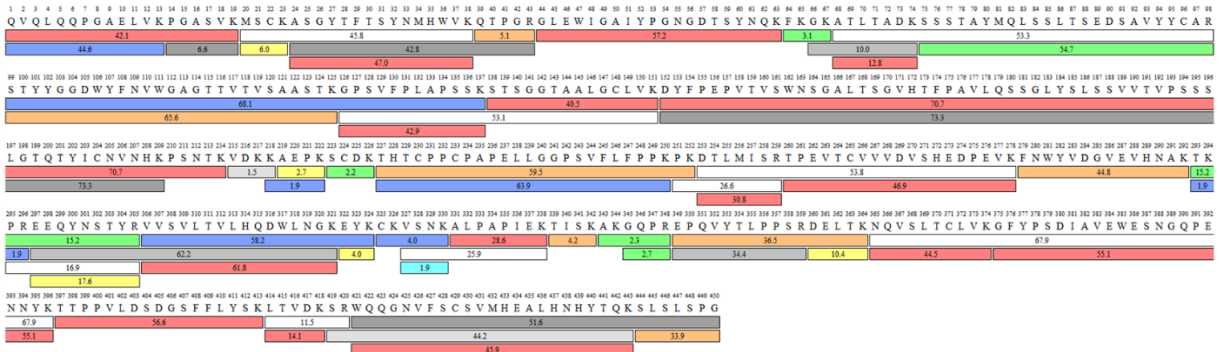

Chimeric IgG1 DP Light Chain

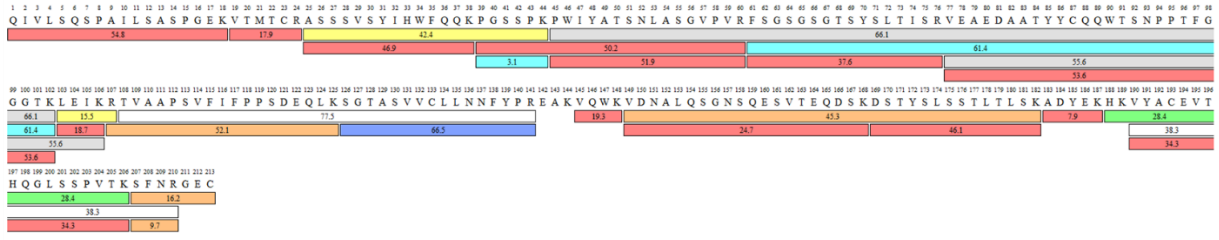

b)

Chimeric IgG1 DP Heavy Chain

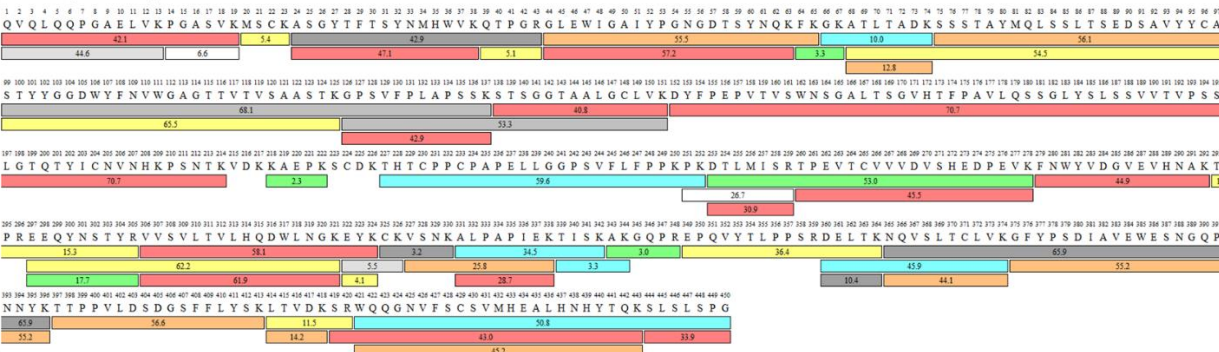

Chimeric IgG1 DP Light Chain

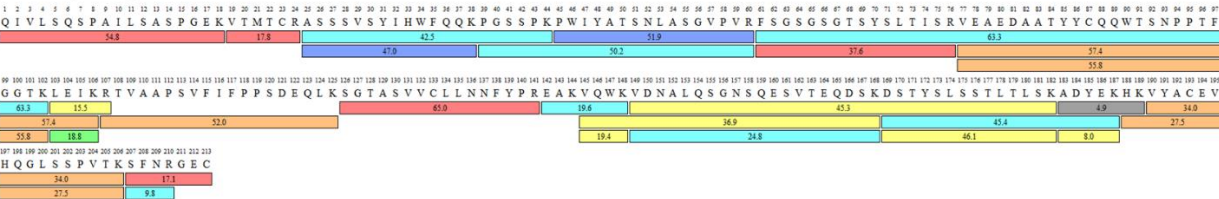

Supplementary Figure 3. BioPharma Finder software dashboard showing the created target peptide workbook during MAM discovery phase for chimeric IgG1 DP.

| Level | Identification                      | Normalized ID                        | Peptide Sequence        | Modification                      | Site         | Normalized Site | Relative Quantification Group Number | Charge State Distribution | RT (min) | RT Start (min) | RT Stop (min) | Theoretical Mass | Protein Name |
|-------|-------------------------------------|--------------------------------------|-------------------------|-----------------------------------|--------------|-----------------|--------------------------------------|---------------------------|----------|----------------|---------------|------------------|--------------|
| 1     | Peptide 1-Q1-K19 = 1976.1055m       | Q1-K19 = 1976.1055m                  | QVQLQGPQAEIVKPGASIVK    | None                              |              |                 |                                      | 1                         | 3-3      | 37.34          | 37.00         | 37.35            | 1976.1055    |
| 2     | Peptide 1-Q1-K19 = 1976.1055m(Q1)   | Q1-K19 = 1976.1055m(Q1)+NH3 loss     | QVQLQGPQAEIVKPGASIVK    | NH3 loss                          | Q1           | Q1              |                                      | 1                         | 1-3      | 44.12          | 43.95         | 44.36            | 1959.0789    |
| 3     | Peptide 2-Q1-K18 = 1823.9993m       | Q1-K18 = 1823.9993m                  | QVLSQSPRAISASPGEEK      | None                              |              |                 |                                      | 2                         | 2-3      | 47.79          | 47.60         | 48.00            | 1823.9993    |
| 4     | Peptide 2-Q1-K18 = 1823.9993m(Q1)   | Q1-K18 = 1823.9993m(Q1)+NH3 loss     | QVLSQSPRAISASPGEEK      | NH3 loss                          | Q1           | Q1              |                                      | 2                         | 1-3      | 58.06          | 57.85         | 58.27            | 1806.9727    |
| 5     | Peptide 1-5444-G450 = 659.3490m     | S1-G7 = 659.3490m(G7-Lys)            | SLSLSPG                 | Lys                               | G450         | G7              |                                      | 3                         | 1-2      | 26.66          | 26.37         | 26.86            | 787.4440     |
| 6     | Peptide 1-5444-G450 = 659.3490m     | S1-G7 = 659.3490m                    | SLSLSPG                 | None                              |              |                 |                                      | 3                         | 1-2      | 34.61          | 34.45         | 34.79            | 659.3490     |
| 7     | Peptide 1-G44-K63 = 2182.0331m      | G1-K20 = 2182.0331m                  | GLEWGSAYPNQDTSYHNQK     | None                              |              |                 |                                      | 4                         | 2-4      | 60.27          | 60.02         | 60.60            | 2182.0331    |
| 8     | Peptide 1-G44-K63 = 2182.0331m(N5)  | G1-K20 = 2182.0331m(N12-Deamidation) | GLEWGSAYPNQDTSYHNQK     | Deamidation                       | N55          | N12             |                                      | 4                         | 2-3      | 61.01          | 60.76         | 61.41            | 2182.0331    |
| 9     | Peptide 1-G44-K63 = 2182.0331m(N5)  | G1-K20 = 2182.0331m(N12-NH3 loss)    | GLEWGSAYPNQDTSYHNQK     | NH3 loss                          | N55          | N12             |                                      | 4                         | 2-3      | 61.65          | 61.47         | 61.84            | 2165.0065    |
| 10    | Peptide 1-F279-K292 = 1676.7947m    | F1-K14 = 1676.7947m(N12-Deamidation) | FNWYVDVEVHNAK           | Deamidation                       | N290         | N12             |                                      | 5                         | 3-3      | 47.80          | 47.82         | 48.07            | 1677.7787    |
| 11    | Peptide 1-F279-K292 = 1676.7947m    | F1-K14 = 1676.7947m(N12-NH3 loss)    | FNWYVDVEVHNAK           | NH3 loss                          | N290         | N12             |                                      | 5                         | 2-3      | 49.73          | 49.60         | 49.93            | 1659.7682    |
| 12    | Peptide 1-F279-K292 = 1676.7947m    | F1-K14 = 1676.7947m                  | FNWYVDVEVHNAK           | None                              |              |                 |                                      | 5                         | 1-4      | 46.59          | 46.51         | 46.75            | 1676.7947    |
| 13    | Peptide 1-F279-K292 = 1676.7947m    | F1-K14 = 1676.7947m(N2-NH3 loss)     | FNWYVDVEVHNAK           | NH3 loss                          | N280         | N2              |                                      | 5                         | 3-3      | 50.92          | 50.82         | 51.07            | 1659.7682    |
| 14    | Peptide 1-F279-K292 = 1676.7947m    | F1-K14 = 1676.7947m(D6-H2O loss)     | FNWYVDVEVHNAK           | H2O loss                          | D284         | D6              |                                      | 5                         | 2-3      | 52.12          | 52.00         | 52.36            | 1655.7641    |
| 15    | Peptide 1-V306-K321 = 1806.9992m    | V1-K16 = 1806.9992m                  | VVSVLTVHQDWLNGK         | None                              |              |                 |                                      | 6                         | 1-3      | 64.90          | 64.79         | 65.26            | 1806.9992    |
| 16    | Peptide 1-V306-K321 = 1806.9992m    | V1-K16 = 1806.9992m(N14-Deamidation) | VVSVLTVHQDWLNGK         | Deamidation                       | N319         | N14             |                                      | 6                         | 3-3      | 66.51          | 66.34         | 66.81            | 1807.9832    |
| 17    | Peptide 1-V306-K321 = 1806.9992m    | V1-K16 = 1806.9992m(N14-NH3 loss)    | VVSVLTVHQDWLNGK         | NH3 loss                          | N319         | N14             |                                      | 6                         | 2-4      | 67.82          | 67.80         | 68.29            | 1789.9727    |
| 18    | Peptide 1-V306-K321 = 1806.9992m    | V1-K16 = 1806.9992m                  | VVSVLTVHQDWLNGK         | None                              |              |                 |                                      | 6                         | 4-4      | 65.19          | 65.02         | 65.49            | 1806.9992    |
| 19    | Peptide 1-G375-K396 = 2543.1241m    | G1-K22 = 2543.1241m                  | GFYPSDAVWESNSGQPNVNYK   | None                              |              |                 |                                      | 7                         | 2-4      | 58.21          | 57.90         | 58.49            | 2543.1241    |
| 20    | Peptide 1-G375-K396 = 2543.1241m    | G1-K22 = 2543.1241m(N19-Deamidation) | GFYPSDAVWESNSGQPNVNYK   | Deamidation                       | -N393        | -N19            |                                      | 7                         | 2-3      | 58.87          | 58.68         | 59.38            | 2544.1081    |
| 21    | Peptide 1-G375-K396 = 2543.1241m    | G1-K22 = 2543.1241m(N20-NH3 loss)    | GFYPSDAVWESNSGQPNVNYK   | NH3 loss                          | -N394        | -N20            |                                      | 7                         | 2-3      | 58.89          | 58.65         | 59.03            | 2526.0975    |
| 22    | Peptide 1-G375-K396 = 2543.1241m    | G1-K22 = 2543.1241m(N14-NH3 loss)    | GFYPSDAVWESNSGQPNVNYK   | NH3 loss                          | -N388        | -N14            |                                      | 7                         | 2-3      | 59.80          | 59.62         | 60.08            | 2526.0975    |
| 23    | Peptide 1-C325-K330 = 735.3585m     | C1-K6 = 735.3585m                    | CKVSNK                  | (Carboxymethylation)              | (C325)       | (C1)            |                                      | 8                         | 1-3      | 2.94           | 2.89          | 3.00             | 735.3585     |
| 24    | Peptide 1-C325-K330 = 735.3585m(N5) | C1-K6 = 735.3585m(N5-Deamidation)    | CKVSNK                  | Deamidation, (Carboxymethylation) | N329, (C325) | N5, (C1)        |                                      | 8                         | 2-3      | 3.87           | 3.78          | 3.99             | 736.3425     |
| 25    | Peptide 1-V327-K330 = 446.2489m     | V1-K4 = 446.2489m                    | VSNK                    | None                              |              |                 |                                      | 8                         | 1-2      | 1.80           | 1.77          | 1.86             | 446.2489     |
| 26    | Peptide 1-A24-K38 = 1790.8086m      | A1-K15 = 1790.8086m(M11-Oxidation)   | ASGYTFTSYNMHWVK         | Oxidation                         | M34          | M11             |                                      | 9                         | 2-3      | 42.99          | 42.77         | 43.18            | 1806.8036    |
| 27    | Peptide 1-A24-K38 = 1790.8086m      | A1-K15 = 1790.8086m                  | ASGYTFTSYNMHWVK         | None                              |              |                 |                                      | 9                         | 1-4      | 49.05          | 48.94         | 49.28            | 1790.8086    |
| 28    | Peptide 1-S75-R88 = 2677.1524m      | S1-R24 = 2677.1524m(M7-Oxidation)    | SSSTAMQLSSLTSEDSAVVYCAR | Oxidation, (Carboxymethylation)   | M81, (C96)   | M7, (C22)       |                                      | 10                        | 2-3      | 54.90          | 54.77         | 54.99            | 2693.1473    |
| 29    | Peptide 1-S75-R88 = 2677.1524m      | S1-R24 = 2677.1524m(M7+Oxidation)    | SSSTAMQLSSLTSEDSAVVYCAR | Oxidation, (Carboxymethylation)   | M81, (C96)   | M7, (C22)       |                                      | 10                        | 2-3      | 55.09          | 54.99         | 55.24            | 2693.1473    |
| 30    | Peptide 1-S75-R88 = 2677.1524m      | S1-R24 = 2677.1524m                  | SSSTAMQLSSLTSEDSAVVYCAR | (Carboxymethylation)              | (C96)        | (C22)           |                                      | 10                        | 2-4      | 57.84          | 57.79         | 58.30            | 2677.1524    |
| 31    | Peptide 1-D253-K259 = 834.4269m     | D1-R7 = 834.4269m(M4+Oxidation)      | DTLMSR                  | Oxidation                         | M256         | M4              |                                      | 11                        | 1-2      | 26.33          | 26.19         | 26.46            | 850.4219     |

Supplementary Figure 4. Chromeleon CDS properties component window for unmodified peptide WQQGNVFSC[Carboxymethylation]SVMHEALHNNHYTQK, which is selected as a reference component to monitor M431+oxidation.

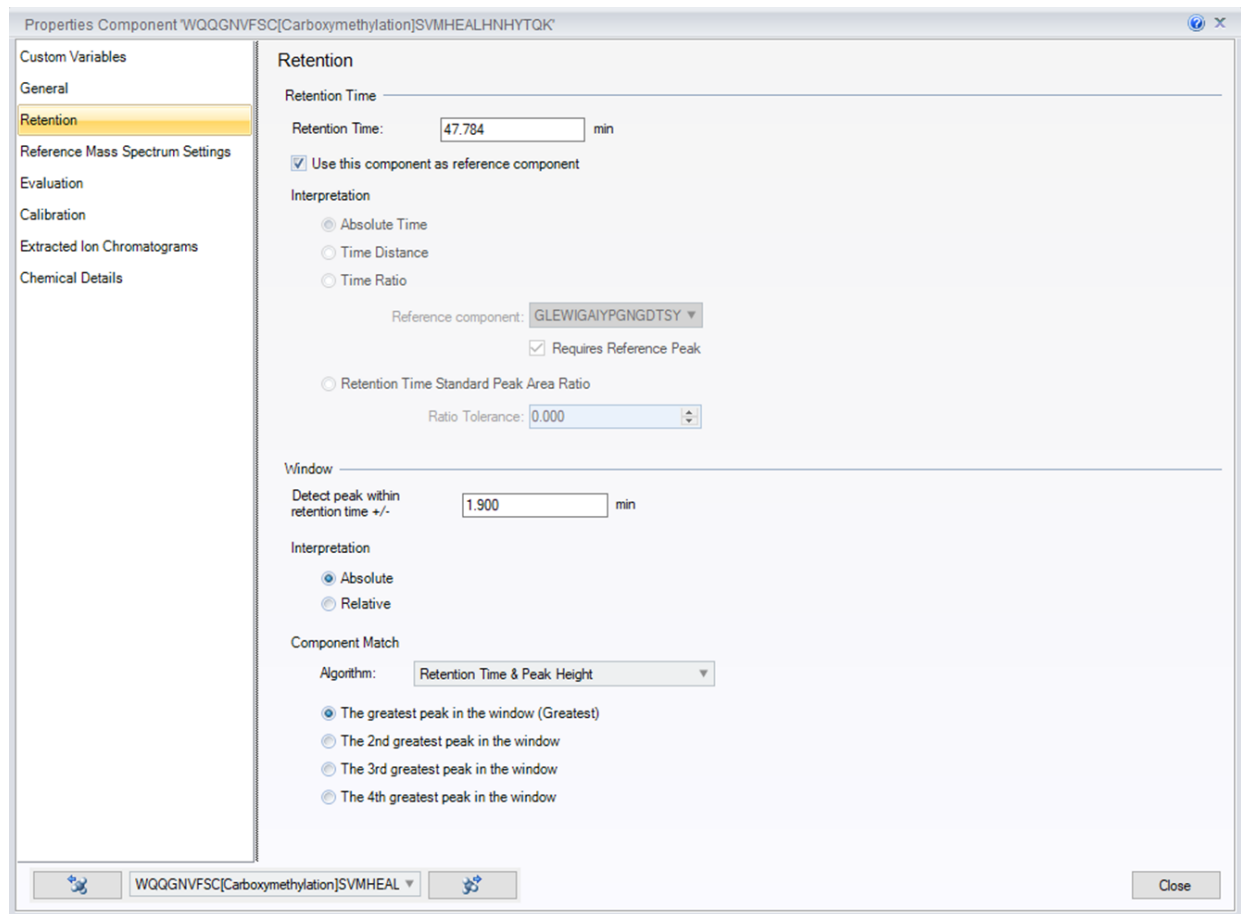

Supplementary Table 1. Summary of PTMs identified and quantified for NIST mAb for in-solution and automated trypsin digestion. Relative abundances are calculated based on triplicate analysis (n=3).

| Modification             | Sequence                       | Relative Abundance (n=3) |              |
|--------------------------|--------------------------------|--------------------------|--------------|
|                          |                                | In-solution              | Automated KF |
| HC N328+deamidation      | VSNKALPAPIEK<br>CKVSNK<br>VSNK | 0.30                     | 0.52         |
| HC~N387/N392+deamidation | GFYPSDIAVEWESNGQPENNYK         | 0.79                     | 0.90         |
| HC N387+succinimide      | GFYPSDIAVEWESNGQPENNYK         | 2.06                     | 0.59         |
| HC M255+oxidation        | DTLMISR                        | 1.26                     | 1.98         |
| HC G450+Lys              | SLSLPG                         | 12.99                    | 13.88        |
| HC N300+A2G0F            | EEQYNSTYR                      | 39.60                    | 39.01        |
| HC N300+A2G1F            | EEQYNSTYR                      | 39.36                    | 39.38        |
| HC N300+A2G2F            | EEQYNSTYR                      | 8.73                     | 8.91         |
