# Supplementary material for: Comprehensive multi-attribute method workflow for biotherapeutic characterization and current good manufacturing practices testing
Source: Springer Nature journal article supplement (doi:10.1038/s41596-022-00785-5), 2022-12-16
Supplement: MOESM2 [file 41596_2022_785_MOESM2_ESM27.pdf]

# Stage 3: Data processing, analysis and reporting\_Step 8

Chromeleon Console

ChimericIgG DP vs BS\_SeqVariant

Imported

Save Studio Print Up Insert Row Fill Down Lock Filtering Grouping Custom Columns Find Next

| # | TIC | Name        | Type    | Level | Position | Volume | Instrument Method | Processing Method       | Status   | Inject Time             | Lock Status | Weight | Dilution | IntStd | Replicate ID | Comment | Re-injections | Spike G |
|---|-----|-------------|---------|-------|----------|--------|-------------------|-------------------------|----------|-------------------------|-------------|--------|----------|--------|--------------|---------|---------------|---------|
| 2 |     | iclgG1 DP_1 | Unknown |       | 0        | 1.0000 | MAM               | Proc Method_SeqVarian.. | Idle     |                         |             | 1.0000 | 1.0000   | 1.0000 |              |         | 0             |         |
| 3 |     | iclgG1 DP_2 | Unknown |       |          | 1.0000 | MAM               | Proc Method_SeqVarian.. | Finished | 8/6/2020 3:15:56 PM +.. |             | 1.0000 | 1.0000   | 1.0000 |              |         | 0             |         |
| 4 |     | iclgG1 DP_3 | Unknown |       |          | 1.0000 | MAM               | Proc Method_SeqVarian.. | Finished | 8/6/2020 7:17:44 PM +.. |             | 1.0000 | 1.0000   | 1.0000 |              |         | 0             |         |
| 5 |     | iclgG1 BS_1 | Unknown |       |          | 1.0000 | MAM               | Proc Method_SeqVarian.. | Finished | 8/6/2020 11:19:32 PM..  |             | 1.0000 | 1.0000   | 1.0000 |              |         | 0             |         |
| 6 |     | iclgG1 BS_2 | Unknown |       |          | 1.0000 | MAM               | Proc Method_SeqVarian.. | Finished | 8/7/2020 4:27:08 AM +.. |             | 1.0000 | 1.0000   | 1.0000 |              |         | 0             |         |
| 7 |     | iclgG1 BS_3 | Unknown |       |          | 1.0000 | MAM               | Proc Method_SeqVarian.. | Finished | 8/7/2020 12:31:08 PM..  |             | 1.0000 | 1.0000   | 1.0000 |              |         | 0             |         |

Click here to add a new injection

Export...

Report Template & Channel

Use report template: MAM Report IgG1BS CQAs\_01

With selected channel: [Dropdown]

Destination Path

Parent Folder: [Field]

Sub Folder: [Field]

Export Formats & Filenames

- Text format (Results) (\*.txt)
- Text format (Raw Data) (\*.txt, \*.csv)
- Excel file format (\*.xls)
- PDF file format (\*.pdf)
- GAML file format (\*.gaml)
- AnDI/NetCDF file format (\*.cdf)
- Raw file format (\*.raw)
- Chromeleon data file format (\*.cmbx)
- Allotrope data file format (\*.adf)

External Program

Call external program

Notifications

Enable Notifications

OK Cancel

Associated Items: Custom Sequence Variables (0), Custom Formulas

# Stage 3: Data processing, analysis and reporting\_Step 9

Home

Select an experiment type.

### Experiment Types

- Sequence Manager >
- Peptide Mapping Analysis >
- Oligonucleotide Analysis >
- Intact Mass Analysis >
- Top Down Analysis >

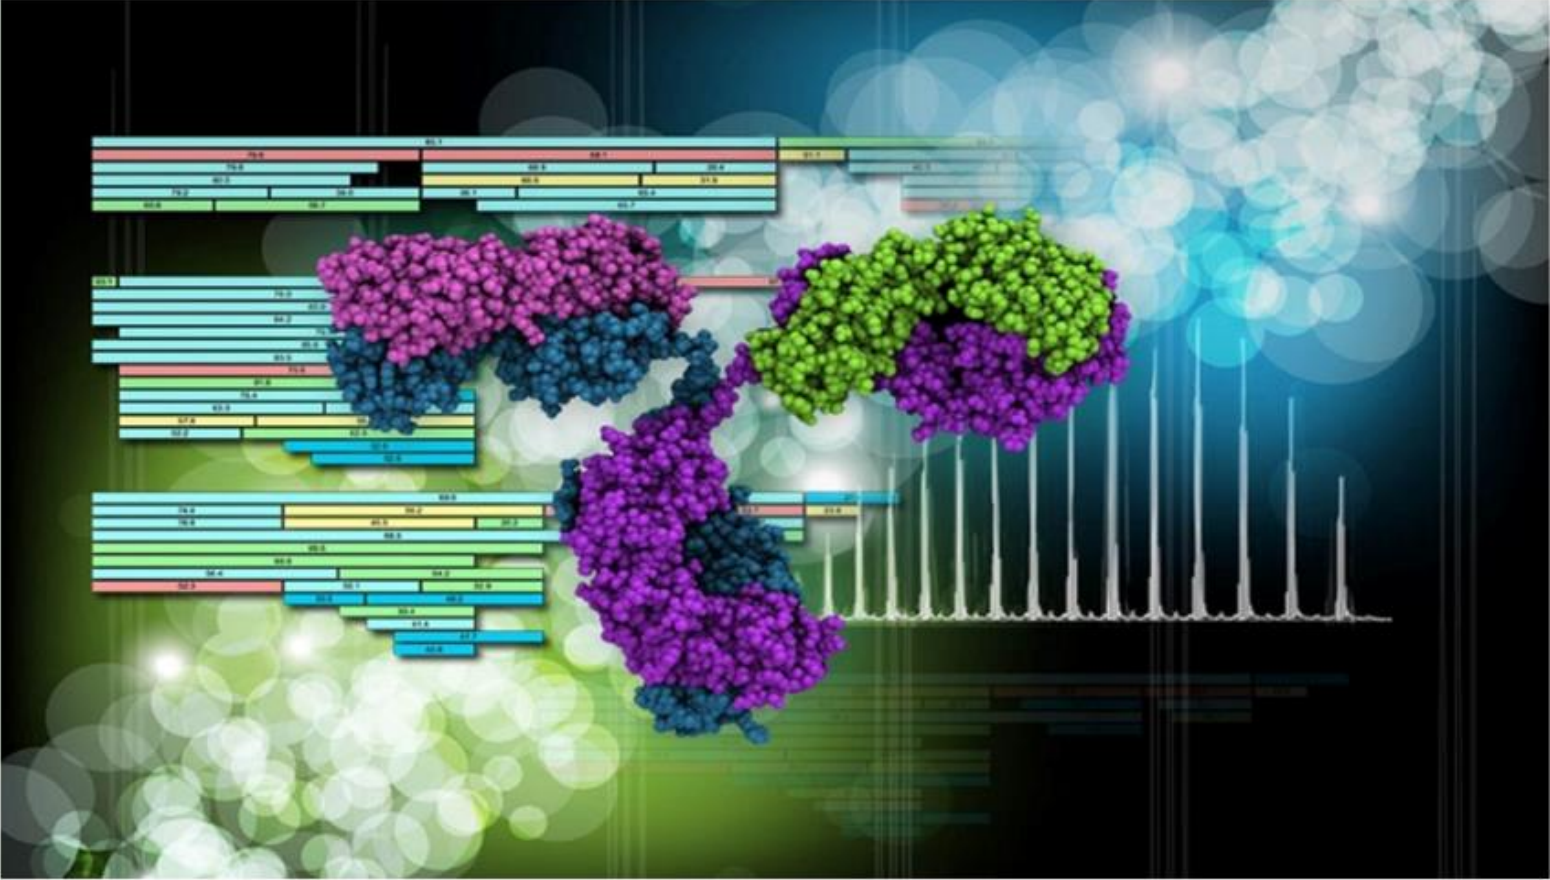

Peptide Mapping Analysis      Oligonucleotide Analysis      Intact Mass Analysis      Top Down Analysis

# Stage 3: Data processing, analysis and reporting\_Step 9

Protein Sequence Editor

Variable modifications selection. Import Fasta File Define Modification List Save Save As New Cancel

### Protein Sequence Information

**Target Protein**

Name:

Description:

Category:

Monoisotopic Mass:

Average Mass:

Formula:

**Chain**

Chain:

Monoisotopic Mass:

Average Mass:

### Manual Input Protein Sequence

Variable Modifications for Intact and Peptide Analysis

Max # Modifications: Intact Protein  Peptide Mapping

Glycosylation (O Glycan supported only for peptide mapping): N, O Glycan

**Modifications**

**Modifications Selected for Search**

**N Terminal**

Mono. Mass:

Avg. Mass:

**C Terminal**

Mono. Mass:

Avg. Mass:

**Side Chain**

Mono. Mass:

Avg. Mass:

Residues:

2AA instead of Asn  
2AB instead of Asn  
Acetylation (N-term)  
Arg  
Asp  
Carbamylation (N-term)  
DOTA  
DOTA\_Mn  
DOTA\_Cu  
DOTA\_Zn  
Glu  
Lys  
NEM

Amide (C-term)  
Arg  
Asp  
b ion  
Glu  
Lys

Acetylation  
ADP-ribosylation  
Amidation  
Carbamylation  
Carbamidomethylation  
Carboxymethylation  
Cysteinylation  
Cysteinylation  
Deamidation (N)  
Deamidation (Q)  
Decarboxylation  
Dimethylation  
DOTA

### Protein Sequence Map

### Disulfide Link Definitions

| Chain Number         | Amino Acid Site Index | Chain Number         | Amino Acid Site Index |
|----------------------|-----------------------|----------------------|-----------------------|
| <input type="text"/> | <input type="text"/>  | <input type="text"/> | <input type="text"/>  |

Site-Specific Variable Modifications for Top Down Analysis

Modification Editor

# Stage 3: Data processing, analysis and reporting\_Step 10

Home

Select an experiment type.

### Experiment Types

- Sequence Manager >
- Peptide Mapping Analysis >
- Oligonucleotide Analysis >
- Intact Mass Analysis >
- Top Down Analysis >

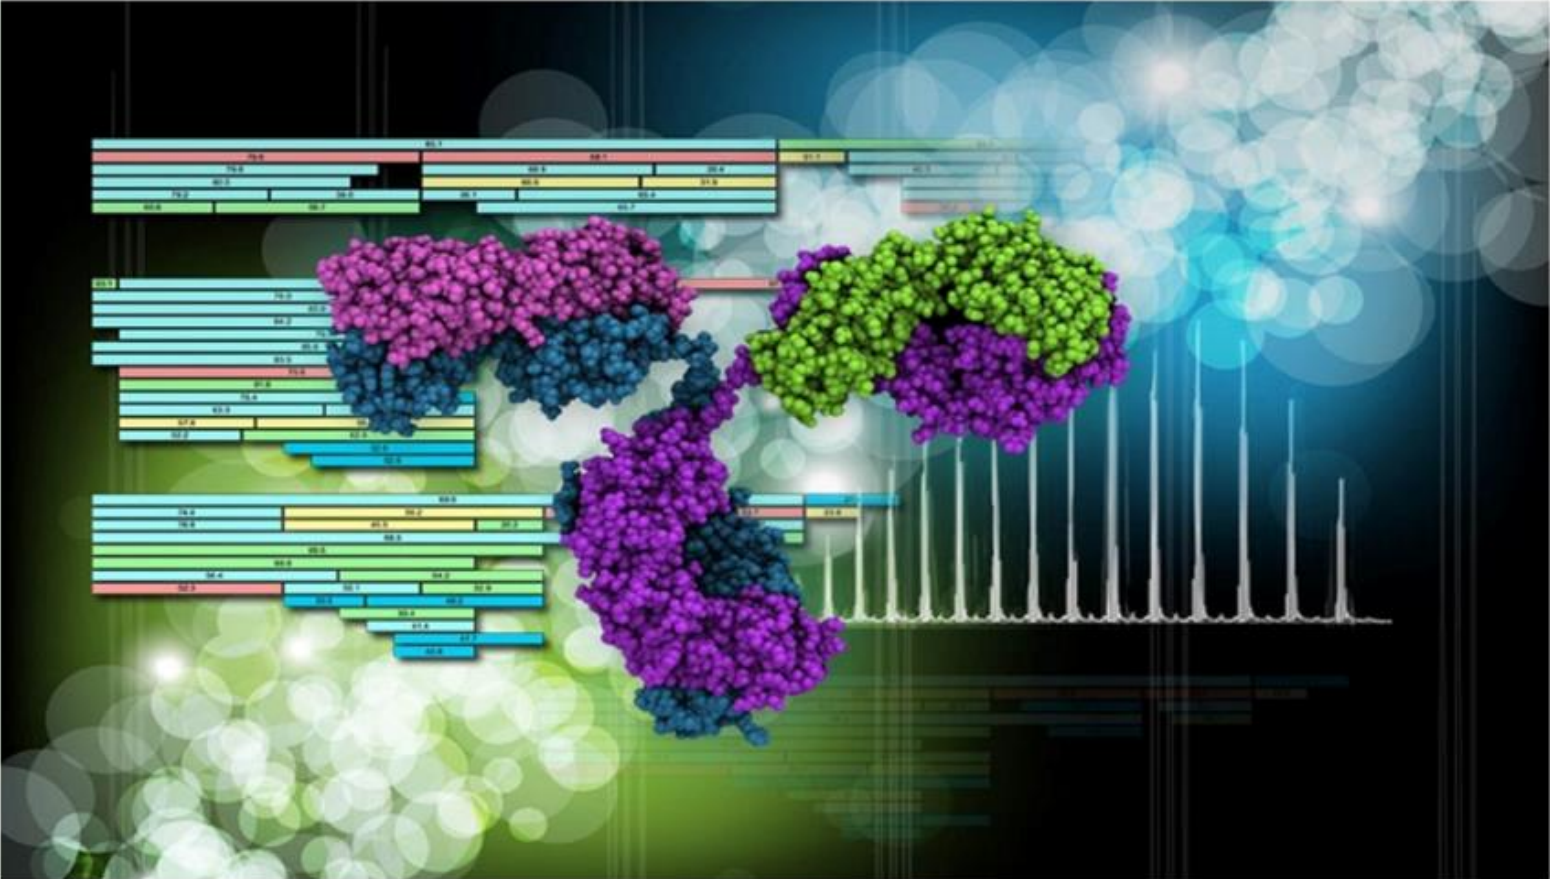

Peptide Mapping Analysis      Oligonucleotide Analysis      Intact Mass Analysis      Top Down Analysis

# Stage 3: Data processing, analysis and reporting\_Step 10

Peptide Mapping Analysis
  Load Results
  Queue
  Target Peptide Workbook

Import Method Export Method

Select a protein sequence.

### Peptide Mapping Analysis Definition

Experiment Name:

### Load Raw Data

Select Raw Data:  ...

Load Raw Data Condition:

Reference Condition:

### Result Format For Multiple Raw Files

Batch Processing
  Multiconsensus

### Protein Sequence

| Select                   | Name               | Category         | Last Modified Time    | Monoisotopic Mass | Num. of Chains/ Num. of Entries | Max. Num. of Modifications | Total Number of Amino Acids |
|--------------------------|--------------------|------------------|-----------------------|-------------------|---------------------------------|----------------------------|-----------------------------|
| <input type="checkbox"/> |                    | Peptide Mapping  | 02/01/2021 01:37 P... | 73408.40          | 2                               | 1                          | 662                         |
| <input type="checkbox"/> |                    | Peptide Mapping  | 02/24/2021 03:37 P... | 82179.01          | 1                               | 1                          | 735                         |
| <input type="checkbox"/> |                    | Peptide Mapping  | 04/12/2021 11:44...   | 73424.14          | 2                               | 1                          | 662                         |
| <input type="checkbox"/> |                    | Peptide Mapping  | 10/26/2021 09:56...   | 73025.74          | 2                               | 1                          | 663                         |
| <input type="checkbox"/> | Chimeric IgG1DP... | Peptide Mapping  | 10/26/2021 09:57...   | 73025.74          | 2                               | 1                          | 663                         |
| <input type="checkbox"/> | MAM Discovery...   | Targeted Peptide | 11/05/2021 12:44 P... | 80                |                                 |                            |                             |

### Processing Method

Enable Automatic Parameter Values

| Select                   | Name                          | Method Type  | Description                               |
|--------------------------|-------------------------------|--------------|-------------------------------------------|
| <input type="checkbox"/> | Basic Default Method          | Non Targeted | Default Method for Basic Peptide Mappi... |
| <input type="checkbox"/> | Disulfide Bond Default Method | Non Targeted | Default Method for Disulfide Bond         |
| <input type="checkbox"/> | HDX Default Method            | Non Targeted | Default Method for HDX                    |
| <input type="checkbox"/> | Targeted Default Method       | Targeted     | Default Method for Targeted Analysis      |
| <input type="checkbox"/> |                               | Non Targeted | Default Host Cell Protein Method          |
| <input type="checkbox"/> |                               | Non Targeted | Default Host Cell Protein Method          |
| <input type="checkbox"/> |                               | Non Targeted | Default Host Cell Protein Method          |
| <input type="checkbox"/> |                               | Non Targeted | Default Host Cell Protein Method          |
| <input type="checkbox"/> |                               | Non Targeted | Default Method for Basic Peptide Mappi... |
| <input type="checkbox"/> |                               | Non Targeted | Default Method for Basic Peptide Mappi... |

Start Processing
Edit Method

# Stage 3: Data processing, analysis and reporting\_Step 11

The screenshot shows a software interface with a top navigation bar containing tabs: Home, Peptide Mapping Analysis, Load Results (selected), Queue, and Target Peptide Workbook. Below the tabs is a search bar with the text "Select an experiment to load its results." and buttons for Load Results, Delete, Export Results, and Import Results.

The main area displays a "Master List" table with the following columns: Experiment Name, Raw File Name, Method Name, Method Type, Method Description, Sequence Name, Completion Time, and Total Processing Time (min). The table contains 9 rows, with the 9th row selected.

| Experiment Name                        | Raw File Name                       | Method Name                   | Method Type  | Method Description                  | Sequence Name          | Completion Time     | Total Processing Time (min) |
|----------------------------------------|-------------------------------------|-------------------------------|--------------|-------------------------------------|------------------------|---------------------|-----------------------------|
| 1                                      | C:\Users\Silvia\Desktop\THERMO...   |                               | Non Targeted | Default Host Cell Protein Method    |                        | 01/22/2021 03:26 PM | 0.00                        |
| 2                                      | E:\BPF Datafiles\15_BPF4.1 HCP A... |                               | Non Targeted | Default Host Cell Protein Method    |                        | 01/22/2021 04:03 PM | 0.00                        |
| 3                                      | C:\Users\Silvia\Desktop\THERMO...   |                               | Non Targeted | Default Host Cell Protein Method    |                        | 02/24/2021 04:00 PM | 16.90                       |
| 4                                      | C:\Users\Silvia\Desktop\THERMO...   |                               | Non Targeted | Default Host Cell Protein Method    |                        | 04/12/2021 11:50 AM | 3.82                        |
| 5                                      | C:\Users\Silvia\Desktop\BPF Data... |                               | Non Targeted | Default Method for Basic Peptide... |                        | 04/09/2021 03:18 PM | 0.00                        |
| 6                                      | C:\Users\Silvia\Desktop\BPF Data... |                               | Non Targeted | Default Method for Basic Peptide... |                        | 05/11/2021 05:02 PM | 4.12                        |
| 7                                      | C:\Users\Silvia\Desktop\THERMO...   |                               | Non Targeted | Default Method for Basic Peptide... |                        | 04/30/2021 06:10 PM | 0.00                        |
| 8                                      | C:\Users\Silvia\Desktop\THERMO...   |                               | Non Targeted | Default Method for Basic Peptide... |                        | 06/04/2021 02:29 PM | 0.00                        |
| 9 MAM Discovery Phase Chimeric IgG1_DP | C:\Users\Silvia\Desktop\BPF Data... | Basic Default Method_NIBRT_01 | Non Targeted | Default Method for Basic Peptide... | Chimeric IgG1DP_PepMap | 11/05/2021 11:33 AM | 6.31                        |

On the left side of the interface, there is a vertical sidebar labeled "Experiment Management" with an orange arrow pointing to the right.

# Stage 3: Data processing, analysis and reporting\_Step 11

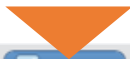

Home Peptide Mapping Analysis Load Results Queue Parameters Process and Review Mapping Target Peptide Workbook

Coverage Modification Summary

Use the check boxes in the Results table on the Process and Review page to select the components for the user-definable protein coverage map.

### Chromatogram

Chromatogram 1: BPC: C:\Users\Silvia\Desktop\BPF DataFiles\25. Nature Protocols data processing\Chimeric IgG1 DP\_1\_MSMS.raw

Chromatogram 2: BPC: C:\Users\Silvia\Desktop\BPF DataFiles\25. Nature Protocols data processing\Chimeric IgG1 DP\_2\_MSMS.raw

Chromatogram 3: BPC: C:\Users\Silvia\Desktop\BPF DataFiles\25. Nature Protocols data processing\Chimeric IgG1 DP\_3\_MSMS.raw

## Sequence Coverage Map

Created on 09/21/22 by Silvia  
 Data Folder = C:\Users\Silvia\Desktop\BPF DataFiles\25. Nature Protocols data processing\  
 Minimum MS Signal = 20000  
 Data File = Chimeric IgG1 DP\_1\_MSMS.raw  
 Protease = Trypsin

| Proteins     | Number of MS Peaks | MS Peak Area | Sequence Coverage | Abundance (mol) |
|--------------|--------------------|--------------|-------------------|-----------------|
| Heavy Chain  | 1470               | 57.7%        | 98.7%             | 69.50%          |
| Light Chain  | 691                | 20.5%        | 98.6%             | 30.50%          |
| Unidentified | 12904              | 21.7%        |                   |                 |

Minimum Recovery = 1%  
 Minimum Recovery of Overlapping Peptides = 0%  
 Minimum Confidence = 0.8  
 Maximum Mass = 7000

Color code for peptide recovery

|        |        |        |       |       |       |       |       |       |       |
|--------|--------|--------|-------|-------|-------|-------|-------|-------|-------|
| >50.0% | >20.0% | >10.0% | >5.0% | >2.0% | >1.0% | >0.5% | >0.2% | >0.1% | >0.0% |
| good   | fair   | poor   |       |       |       |       |       |       |       |

### Heavy Chain

1 2 3 4 5 6 7 8 9 10 11 12 13 14 15 16 17 18 19 20 21 22 23 24 25 26 27 28 29 30 31 32 33 34 35 36 37 38 39 40 41 42 43 44 45 46 47

Q V Q L Q Q P G A E L V K P G A S V K M S C K A S G Y T F T S Y N M H W V K Q T P G R G L E W

51 52 53 54 55 56 57 58 59 60 61 62 63 64 65 66 67 68 69 70 71 72 73 74 75 76 77 78 79 80 81 82 83 84 85 86 87 88 89 90 91 92 93 94 95 96 97

I Y P G N G D T S Y N Q K F K G K A T L T A D K S S S T A Y M Q L S S L T S E D S A V Y Y C A

### Chromatogram

### Results

| Level | Flag    | No. | Protein      |
|-------|---------|-----|--------------|
| 1     | Protein | 1   | Heavy Chain  |
| 2     | Protein | 2   | Light Chain  |
| 3     | Protein | 3   | Unidentified |

# Stage 3: Data processing, analysis and reporting\_Step 12

Home
  Peptide Mapping Analysis
  Load Results
  Queue
  Parameters
  Process and Review
  Mapping
  Target Peptide Workbook

Coverage
  Modification Summary

### Modification Results

| Created             | Data Folder                                                                | Protease | Peptide Minimum Intensity (%) | Charge State Minimum Intensity (%) | Minimum Modification Level (%) | Raw File Name |
|---------------------|----------------------------------------------------------------------------|----------|-------------------------------|------------------------------------|--------------------------------|---------------|
| 9/21/2022 by Silvia | C:\Users\Silvia\Desktop\BPF DataFiles\25. Nature Protocols data processing | Trypsin  | 17.00%                        | 33.00%                             | 0.0005%                        | SampleName    |

  

| Protein        | Residue # | Modification       | Category     | Comment             | Normalized Time Shift | Predicted Time Shift | Peptides             | Peptide Sequence   |
|----------------|-----------|--------------------|--------------|---------------------|-----------------------|----------------------|----------------------|--------------------|
| 1 Heavy Chain  | 1         | -Q1+Deamidation    | +Deamidation | None                | 2.1%                  | 2.8%                 | 1:Q1-K19 = 1976.1... | QVQLQQPGAEIVK...   |
| 2 Heavy Chain  | 55        | N55+Deamidation    | +Deamidation | None                | 1.8%                  | 3.2%                 | 1:G44-K63 = 2182...  | GLEWIGAIYPGNGD...  |
| 3 Heavy Chain  | 82        | Q82+Deamidation    | +Deamidation | None                | 0.8%                  | 2.9%                 | 1:S75-R98 = 2677...  | SSSTAYMQLSSLTSE... |
| 4 Heavy Chain  | 163       | -N163+Deamidati... | +Deamidation | Retention time off? | 87.8%                 | 1.1%                 | 1:D152-K214 = 67...  | DYFPEPVTVSWNS...   |
| 5 Heavy Chain  | 179       | -Q179+Deamidati... | +Deamidation | Retention time off? | 74.9%                 | 1.1%                 | 1:D152-K214 = 67...  | DYFPEPVTVSWNS...   |
| 6 Heavy Chain  | 207       | -N207+Deamidati... | +Deamidation | Retention time off? | 64.7%                 | 1.1%                 | 1:D152-K214 = 67...  | DYFPEPVTVSWNS...   |
| 7 Heavy Chain  | 290       | N290+Deamidation   | +Deamidation | None                | 3.2%                  | 4.7%                 | 1:F279-K292 = 167... | FNWYVDGVEVHNAK     |
| 8 Heavy Chain  | 319       | N319+Deamidation   | +Deamidation | None                | 3.4%                  | 3.9%                 | 1:V306-K321 = 18...  | VVSVLTLHQDWL...    |
| 9 Heavy Chain  | 329       | N329+Deamidation   | +Deamidation | Poor recovery       | 2.3%                  | 0.0%                 | 1:C325-K330 = 73...  | CKVSNK             |
| 10 Heavy Chain | 365       | -N365+Deamidati... | +Deamidation | None                | 11.3%                 | 7.7%                 | 1:N365-K374 = 11...  | NQVSLTCLVK; NQV... |
| 11 Heavy Chain | 393       | -N393+Deamidati... | +Deamidation | None                | 1.6%                  | 3.2%                 | 1:G375-K396 = 25...  | GFYPSDIAVEWESN...  |
| 12 Heavy Chain | 423       | Q423+Deamidation   | +Deamidation | None                | 3.5%                  | 3.9%                 | 1:W421-K443 = 28...  | WQQGGNVFSCVSM...   |
| 13 Light Chain | 36        | -Q36+Deamidation   | +Deamidation | None                | 2.4%                  | 4.6%                 | 2:A25-K38 = 1666...  | ASSSVYIHWFQVK      |

  

### Components

| Level       | No.  | Identification                          | Peptide Sequence        | Modification | Site | Delta (ppm) | Confidence Score | Best Overall Average Structural Resolution | ID |
|-------------|------|-----------------------------------------|-------------------------|--------------|------|-------------|------------------|--------------------------------------------|----|
| 1 Component | 8027 | 1:G44-K63 = 2182.0331m                  | GLEWIGAIYPGNGDTSYN...   | None         |      | -0.51       | 100.0            | 1.1 MS                                     |    |
| 2 Component | 8033 | 1:G44-K63 = 2182.0331m                  | GLEWIGAIYPGNGDTSYN...   | None         |      | -0.73       | 100.0            | 1.1 MS                                     |    |
| 3 Component | 8202 | 1:G44-K63 = 2182.0331m(N55+Deamidati... | GLEWIGAIYPGNGDTSYN...   | Deamidation  | N55  | -0.35       | 100.0            | 1.1 MS                                     |    |
| 4 Component | 8207 | 1:G44-K63 = 2182.0331m(N55+Deamidati... | GLEWIGAIYPGNGDTSYN...   | Deamidation  | N55  | -0.23       | 100.0            | 1.2 MS                                     |    |
| 5 Component | 8413 | 1:G44-K63 = 2182.0331m(N55+NH3 loss)    | GLEWIGAIYPGNGDTSYN...   | NH3 loss     | N55  | -0.43       | 100.0            | 1.3 MS                                     |    |
| 6 Component | 8416 | 1:G44-K63 = 2182.0331m(N55+NH3 loss)    | GLEWIGAIYPGNGDTSYN...   | NH3 loss     | N55  | -0.54       | 100.0            | 1.1 MS                                     |    |
| 7 Component | 749  | 1:N55-K63 = 1025.4414m[nonspecific]     | NGDTSYNQK               | nonspecific  |      | -76.54      | 0.0              | 0.0 Full                                   |    |
| 8 Component | 2301 | 1:H51-K74 = 2617.8773a[nonspecific]     | IYPGNGDTSYNQKFKGKATL... | nonspecific  |      | -351.16     | 0.0              | 0.0 Full                                   |    |

  

### Modification Plot

% Abundance:  Default  Custom

Legend: ● N55+Deamidation

| Sample                           | % Abundance |
|----------------------------------|-------------|
| R1 - Chimeric IgG1 DP_1_MSMS.raw | 0.7728      |
| R2 - Chimeric IgG1 DP_2_MSMS.raw | 0.7575      |
| R3 - Chimeric IgG1 DP_3_MSMS.raw | 0.7356      |



# Stage 3: Data processing, analysis and reporting\_Step 13

Custom Filter Selection

For Field 'Modification'

+ Add Condition - Remove Condition(s) Group Selected: 'And' Group 'Or' Group Toggle

| Operator                                             | Operand     |
|------------------------------------------------------|-------------|
| <input checked="" type="checkbox"/> Does not contain | +           |
| <input checked="" type="checkbox"/> Does not contain | nonspecific |
| <input checked="" type="checkbox"/> Does not contain | gasphase    |
| <input checked="" type="checkbox"/> Does not contain | .           |

Does not contain '+' AND Does not contain 'nonspecific' AND Does not contain 'gasphase' AND Does not contain '.'

'And' Group 'Or' Group OK Cancel

Custom Filter Selection

For Field 'Delta (ppm)'

+ Add Condition - Remove Condition(s) Group Selected: 'And' Group 'Or' Group

| Operator                        | Operand |
|---------------------------------|---------|
| $\geq$ Greater than or equal to | -5      |
| $\leq$ Less than or equal to    | 5       |

$\geq -5$  AND  $\leq 5$

'And' Group 'Or' Group OK Cancel

Custom Filter Selection

For Field 'Confidence Score'

+ Add Condition - Remove Condition(s) Group Selected: 'And' Group 'Or' Group

| Operator                        | Operand |
|---------------------------------|---------|
| $\geq$ Greater than or equal to | 95      |

$\geq 95$

'And' Group 'Or' Group OK Cancel

Custom Filter Selection

For Field 'Missed Cleavages'

+ Add Condition - Remove Condition(s) Group Selected: 'And' Group 'Or' Group

| Operator | Operand |
|----------|---------|
| = Equals | 0       |
| = Equals | 1       |

= '0' OR = '1'

'And' Group 'Or' Group OK Cancel

# Stage 3: Data processing, analysis and reporting\_Steps 14 and 15

Home Peptide Mapping Analysis Load Results Queue Parameters Process and Review **Mapping** Target Peptide Workbook

Coverage Modification Summary Manual Integrate Save

Modification Summary

Modification Results

| Created             | Data Folder                                                                | Protease | Peptide Minimum Intensity (%) | Charge State Minimum Intensity (%) | Minimum Modification Level (%) | Raw File Name |
|---------------------|----------------------------------------------------------------------------|----------|-------------------------------|------------------------------------|--------------------------------|---------------|
| 9/21/2022 by Silvia | C:\Users\Silvia\Desktop\BPF DataFiles\25. Nature Protocols data processing | Trypsin  | 17.00%                        | 33.00%                             | 0.0005%                        | SampleName    |

  

| Protein | Residue #   | Modification           | Category     | Comment             | Normalized Time Shift | Predicted Time Shift | Peptides             | Peptide Sequence   |
|---------|-------------|------------------------|--------------|---------------------|-----------------------|----------------------|----------------------|--------------------|
| 1       | Heavy Chain | 1 ~Q1+Deamidation      | +Deamidation | None                | 2.1%                  | 2.8%                 | 1:Q1-K19 = 1976.1... | QVQLQQPGAELVK...   |
| 2       | Heavy Chain | 55 N55+Deamidation     | +Deamidation | None                | 1.8%                  | 3.2%                 | 1:G44-K63 = 2182...  | GLEWIGAIYPGNGD...  |
| 3       | Heavy Chain | 82 Q82+Deamidation     | +Deamidation | None                | 0.8%                  | 2.9%                 | 1:S75-R98 = 2677...  | SSSTAYMQLSSLTSE... |
| 4       | Heavy Chain | 163 ~N163+Deamidati... | +Deamidation | Retention time off? | 87.8%                 | 1.1%                 | 1:D152-K214 = 67...  | DYFPEPVTVSWNS...   |
| 5       | Heavy Chain | 179 ~Q179+Deamidati... | +Deamidation | Retention time off? | 74.9%                 | 1.1%                 | 1:D152-K214 = 67...  | DYFPEPVTVSWNS...   |
| 6       | Heavy Chain | 207 ~N207+Deamidati... | +Deamidation | Retention time off? | 64.7%                 | 1.1%                 | 1:D152-K214 = 67...  | DYFPEPVTVSWNS...   |
| 7       | Heavy Chain | 290 N290+Deamidation   | +Deamidation | None                | 3.2%                  | 4.7%                 | 1:F279-K292 = 167... | FNWYVDGVEVHNAK     |
| 8       | Heavy Chain | 319 N319+Deamidation   | +Deamidation | None                | 3.4%                  | 3.9%                 | 1:V306-K321 = 18...  | VVSVLTVLHQDWL...   |
| 9       | Heavy Chain | 329 N329+Deamidation   | +Deamidation | Poor recovery       | 2.3%                  | 0.0%                 | 1:C325-K330 = 73...  | CKVSNK             |
| 10      | Heavy Chain | 365 ~N365+Deamidati... | +Deamidation | None                | 11.3%                 | 7.7%                 | 1:N365-K374 = 11...  | NQVSLTCLVK; NQV... |
| 11      | Heavy Chain | 393 ~N393+Deamidati... | +Deamidation | None                | 1.6%                  | 3.2%                 | 1:G375-K396 = 25...  | GFYPSDIAVEWESN...  |
| 12      | Heavy Chain | 423 Q423+Deamidation   | +Deamidation | None                | 3.5%                  | 3.9%                 | 1:W421-K443 = 28...  | WQQGNVFCFSVM...    |
| 13      | Light Chain | 36 ~Q36+Deamidation    | +Deamidation | None                | 2.4%                  | 4.6%                 | 2:A25-K38 = 1666...  | ASSSVYIHWFQQK      |

  

Modification Results

Components

| Level | No.       | Identification                               | Peptide Sequence      | Modification | Site | Delta (ppm) | Confidence Score | Best Overall Average Structural Resolution | ID  |
|-------|-----------|----------------------------------------------|-----------------------|--------------|------|-------------|------------------|--------------------------------------------|-----|
| 1     | Component | 8027 1:G44-K63 = 2182.0331m                  | GLEWIGAIYPGNGDTSYN... | None         |      | -0.51       | 100.0            | 1.1                                        | MS2 |
| 2     | Component | 8033 1:G44-K63 = 2182.0331m                  | GLEWIGAIYPGNGDTSYN... | None         |      | -0.73       | 100.0            | 1.1                                        | MS2 |
| 3     | Component | 8202 1:G44-K63 = 2182.0331m(N55+Deamidati... | GLEWIGAIYPGNGDTSYN... | Deamidation  | N55  | -0.35       | 100.0            | 1.1                                        | MS2 |
| 4     | Component | 8207 1:G44-K63 = 2182.0331m(N55+Deamidati... | GLEWIGAIYPGNGDTSYN... | Deamidation  | N55  | -0.23       | 100.0            | 1.2                                        | MS2 |
| 5     | Component | 8413 1:G44-K63 = 2182.0331m(N55+NH3 loss)    | GLEWIGAIYPGNGDTSYN... | NH3 loss     | N55  | -0.43       | 100.0            | 1.3                                        | MS2 |
| 6     | Component | 8416 1:G44-K63 = 2182.0331m(N55+NH3 loss)    | GLEWIGAIYPGNGDTSYN... | NH3 loss     | N55  | -0.54       | 100.0            | 1.1                                        | MS2 |
| 7     | Component | 8417 1:G44-K63 = 2182.0331m(N55+NH3 loss)    | GLEWIGAIYPGNGDTSYN... | NH3 loss     | N55  | -0.43       | 100.0            | 1.1                                        | MS2 |
| 8     | Component | 8418 1:G44-K63 = 2182.0331m(N55+NH3 loss)    | GLEWIGAIYPGNGDTSYN... | NH3 loss     | N55  | -0.43       | 100.0            | 1.1                                        | MS2 |
| 9     | Component | 8419 1:G44-K63 = 2182.0331m(N55+NH3 loss)    | GLEWIGAIYPGNGDTSYN... | NH3 loss     | N55  | -0.43       | 100.0            | 1.1                                        | MS2 |
| 10    | Component | 8420 1:G44-K63 = 2182.0331m(N55+NH3 loss)    | GLEWIGAIYPGNGDTSYN... | NH3 loss     | N55  | -0.43       | 100.0            | 1.1                                        | MS2 |
| 11    | Component | 8421 1:G44-K63 = 2182.0331m(N55+NH3 loss)    | GLEWIGAIYPGNGDTSYN... | NH3 loss     | N55  | -0.43       | 100.0            | 1.1                                        | MS2 |
| 12    | Component | 8422 1:G44-K63 = 2182.0331m(N55+NH3 loss)    | GLEWIGAIYPGNGDTSYN... | NH3 loss     | N55  | -0.43       | 100.0            | 1.1                                        | MS2 |
| 13    | Component | 8423 1:G44-K63 = 2182.0331m(N55+NH3 loss)    | GLEWIGAIYPGNGDTSYN... | NH3 loss     | N55  | -0.43       | 100.0            | 1.1                                        | MS2 |
| 14    | Component | 8424 1:G44-K63 = 2182.0331m(N55+NH3 loss)    | GLEWIGAIYPGNGDTSYN... | NH3 loss     | N55  | -0.43       | 100.0            | 1.1                                        | MS2 |
| 15    | Component | 8425 1:G44-K63 = 2182.0331m(N55+NH3 loss)    | GLEWIGAIYPGNGDTSYN... | NH3 loss     | N55  | -0.43       | 100.0            | 1.1                                        | MS2 |
| 16    | Component | 8426 1:G44-K63 = 2182.0331m(N55+NH3 loss)    | GLEWIGAIYPGNGDTSYN... | NH3 loss     | N55  | -0.43       | 100.0            | 1.1                                        | MS2 |
| 17    | Component | 8427 1:G44-K63 = 2182.0331m(N55+NH3 loss)    | GLEWIGAIYPGNGDTSYN... | NH3 loss     | N55  | -0.43       | 100.0            | 1.1                                        | MS2 |
| 18    | Component | 8428 1:G44-K63 = 2182.0331m(N55+NH3 loss)    | GLEWIGAIYPGNGDTSYN... | NH3 loss     | N55  | -0.43       | 100.0            | 1.1                                        | MS2 |
| 19    | Component | 8429 1:G44-K63 = 2182.0331m(N55+NH3 loss)    | GLEWIGAIYPGNGDTSYN... | NH3 loss     | N55  | -0.43       | 100.0            | 1.1                                        | MS2 |
| 20    | Component | 8430 1:G44-K63 = 2182.0331m(N55+NH3 loss)    | GLEWIGAIYPGNGDTSYN... | NH3 loss     | N55  | -0.43       | 100.0            | 1.1                                        | MS2 |
| 21    | Component | 8431 1:G44-K63 = 2182.0331m(N55+NH3 loss)    | GLEWIGAIYPGNGDTSYN... | NH3 loss     | N55  | -0.43       | 100.0            | 1.1                                        | MS2 |
| 22    | Component | 8432 1:G44-K63 = 2182.0331m(N55+NH3 loss)    | GLEWIGAIYPGNGDTSYN... | NH3 loss     | N55  | -0.43       | 100.0            | 1.1                                        | MS2 |
| 23    | Component | 8433 1:G44-K63 = 2182.0331m(N55+NH3 loss)    | GLEWIGAIYPGNGDTSYN... | NH3 loss     | N55  | -0.43       | 100.0            | 1.1                                        | MS2 |
| 24    | Component | 8434 1:G44-K63 = 2182.0331m(N55+NH3 loss)    | GLEWIGAIYPGNGDTSYN... | NH3 loss     | N55  | -0.43       | 100.0            | 1.1                                        | MS2 |
| 25    | Component | 8435 1:G44-K63 = 2182.0331m(N55+NH3 loss)    | GLEWIGAIYPGNGDTSYN... | NH3 loss     | N55  | -0.43       | 100.0            | 1.1                                        | MS2 |
| 26    | Component | 8436 1:G44-K63 = 2182.0331m(N55+NH3 loss)    | GLEWIGAIYPGNGDTSYN... | NH3 loss     | N55  | -0.43       | 100.0            | 1.1                                        | MS2 |
| 27    | Component | 8437 1:G44-K63 = 2182.0331m(N55+NH3 loss)    | GLEWIGAIYPGNGDTSYN... | NH3 loss     | N55  | -0.43       | 100.0            | 1.1                                        | MS2 |
| 28    | Component | 8438 1:G44-K63 = 2182.0331m(N55+NH3 loss)    | GLEWIGAIYPGNGDTSYN... | NH3 loss     | N55  | -0.43       | 100.0            | 1.1                                        | MS2 |
| 29    | Component | 8439 1:G44-K63 = 2182.0331m(N55+NH3 loss)    | GLEWIGAIYPGNGDTSYN... | NH3 loss     | N55  | -0.43       | 100.0            | 1.1                                        | MS2 |
| 30    | Component | 8440 1:G44-K63 = 2182.0331m(N55+NH3 loss)    | GLEWIGAIYPGNGDTSYN... | NH3 loss     | N55  | -0.43       | 100.0            | 1.1                                        | MS2 |
| 31    | Component | 8441 1:G44-K63 = 2182.0331m(N55+NH3 loss)    | GLEWIGAIYPGNGDTSYN... | NH3 loss     | N55  | -0.43       | 100.0            | 1.1                                        | MS2 |
| 32    | Component | 8442 1:G44-K63 = 2182.0331m(N55+NH3 loss)    | GLEWIGAIYPGNGDTSYN... | NH3 loss     | N55  | -0.43       | 100.0            | 1.1                                        | MS2 |
| 33    | Component | 8443 1:G44-K63 = 2182.0331m(N55+NH3 loss)    | GLEWIGAIYPGNGDTSYN... | NH3 loss     | N55  | -0.43       | 100.0            | 1.1                                        | MS2 |
| 34    | Component | 8444 1:G44-K63 = 2182.0331m(N55+NH3 loss)    | GLEWIGAIYPGNGDTSYN... | NH3 loss     | N55  | -0.43       | 100.0            | 1.1                                        | MS2 |
| 35    | Component | 8445 1:G44-K63 = 2182.0331m(N55+NH3 loss)    | GLEWIGAIYPGNGDTSYN... | NH3 loss     | N55  | -0.43       | 100.0            | 1.1                                        | MS2 |
| 36    | Component | 8446 1:G44-K63 = 2182.0331m(N55+NH3 loss)    | GLEWIGAIYPGNGDTSYN... | NH3 loss     | N55  | -0.43       | 100.0            | 1.1                                        | MS2 |
| 37    | Component | 8447 1:G44-K63 = 2182.0331m(N55+NH3 loss)    | GLEWIGAIYPGNGDTSYN... | NH3 loss     | N55  | -0.43       | 100.0            | 1.1                                        | MS2 |
| 38    | Component | 8448 1:G44-K63 = 2182.0331m(N55+NH3 loss)    | GLEWIGAIYPGNGDTSYN... | NH3 loss     | N55  | -0.43       | 100.0            | 1.1                                        | MS2 |
| 39    | Component | 8449 1:G44-K63 = 2182.0331m(N55+NH3 loss)    | GLEWIGAIYPGNGDTSYN... | NH3 loss     | N55  | -0.43       | 100.0            | 1.1                                        | MS2 |
| 40    | Component | 8450 1:G44-K63 = 2182.0331m(N55+NH3 loss)    | GLEWIGAIYPGNGDTSYN... | NH3 loss     | N55  | -0.43       | 100.0            | 1.1                                        | MS2 |
| 41    | Component | 8451 1:G44-K63 = 2182.0331m(N55+NH3 loss)    | GLEWIGAIYPGNGDTSYN... | NH3 loss     | N55  | -0.43       | 100.0            | 1.1                                        | MS2 |
| 42    | Component | 8452 1:G44-K63 = 2182.0331m(N55+NH3 loss)    | GLEWIGAIYPGNGDTSYN... | NH3 loss     | N55  | -0.43       | 100.0            | 1.1                                        | MS2 |
| 43    | Component | 8453 1:G44-K63 = 2182.0331m(N55+NH3 loss)    | GLEWIGAIYPGNGDTSYN... | NH3 loss     | N55  | -0.43       | 100.0            | 1.1                                        | MS2 |
| 44    | Component | 8454 1:G44-K63 = 2182.0331m(N55+NH3 loss)    | GLEWIGAIYPGNGDTSYN... | NH3 loss     | N55  | -0.43       | 100.0            | 1.1                                        | MS2 |
| 45    | Component | 8455 1:G44-K63 = 2182.0331m(N55+NH3 loss)    | GLEWIGAIYPGNGDTSYN... | NH3 loss     | N55  | -0.43       | 100.0            | 1.1                                        | MS2 |
| 46    | Component | 8456 1:G44-K63 = 2182.0331m(N55+NH3 loss)    | GLEWIGAIYPGNGDTSYN... | NH3 loss     | N55  | -0.43       | 100.0            | 1.1                                        | MS2 |
| 47    | Component | 8457 1:G44-K63 = 2182.0331m(N55+NH3 loss)    | GLEWIGAIYPGNGDTSYN... | NH3 loss     | N55  | -0.43       | 100.0            | 1.1                                        | MS2 |
| 48    | Component | 8458 1:G44-K63 = 2182.0331m(N55+NH3 loss)    | GLEWIGAIYPGNGDTSYN... | NH3 loss     | N55  | -0.43       | 100.0            | 1.1                                        | MS2 |
| 49    | Component | 8459 1:G44-K63 = 2182.0331m(N55+NH3 loss)    | GLEWIGAIYPGNGDTSYN... | NH3 loss     | N55  | -0.43       | 100.0            | 1.1                                        | MS2 |
| 50    | Component | 8460 1:G44-K63 = 2182.0331m(N55+NH3 loss)    | GLEWIGAIYPGNGDTSYN... | NH3 loss     | N55  | -0.43       | 100.0            | 1.1                                        | MS2 |
| 51    | Component | 8461 1:G44-K63 = 2182.0331m(N55+NH3 loss)    | GLEWIGAIYPGNGDTSYN... | NH3 loss     | N55  | -0.43       | 100.0            | 1.1                                        | MS2 |
| 52    | Component | 8462 1:G44-K63 = 2182.0331m(N55+NH3 loss)    | GLEWIGAIYPGNGDTSYN... | NH3 loss     | N55  | -0.43       | 100.0            | 1.1                                        | MS2 |
| 53    | Component | 8463 1:G44-K63 = 2182.0331m(N55+NH3 loss)    | GLEWIGAIYPGNGDTSYN... | NH3 loss     | N55  | -0.43       | 100.0            | 1.1                                        | MS2 |
| 54    | Component | 8464 1:G44-K63 = 2182.0331m(N55+NH3 loss)    | GLEWIGAIYPGNGDTSYN... | NH3 loss     | N55  | -0.43       | 100.0            | 1.1                                        | MS2 |
| 55    | Component | 8465 1:G44-K63 = 2182.0331m(N55+NH3 loss)    | GLEWIGAIYPGNGDTSYN... | NH3 loss     | N55  | -0.43       | 100.0            | 1.1                                        | MS2 |
| 56    | Component | 8466 1:G44-K63 = 2182.0331m(N55+NH3 loss)    | GLEWIGAIYPGNGDTSYN... | NH3 loss     | N55  | -0.43       | 100.0            | 1.1                                        | MS2 |
| 57    | Component | 8467 1:G44-K63 = 2182.0331m(N55+NH3 loss)    | GLEWIGAIYPGNGDTSYN... | NH3 loss     | N55  | -0.43       | 100.0            | 1.1                                        | MS2 |
| 58    | Component | 8468 1:G44-K63 = 2182.0331m(N55+NH3 loss)    | GLEWIGAIYPGNGDTSYN... | NH3 loss     | N55  | -0.43       | 100.0            | 1.1                                        | MS2 |
| 59    | Component | 8469 1:G44-K63 = 2182.0331m(N55+NH3 loss)    | GLEWIGAIYPGNGDTSYN... | NH3 loss     | N55  | -0.43       | 100.0            | 1.1                                        | MS2 |
| 60    | Component | 8470 1:G44-K63 = 2182.0331m(N55+NH3 loss)    | GLEWIGAIYPGNGDTSYN... | NH3 loss     | N55  | -0.43       | 100.0            | 1.1                                        | MS2 |
| 61    | Component | 8471 1:G44-K63 = 2182.0331m(N55+NH3 loss)    | GLEWIGAIYPGNGDTSYN... | NH3 loss     | N55  | -0.43       | 100.0            | 1.1                                        | MS2 |
| 62    | Component | 8472 1:G44-K63 = 2182.0331m(N55+NH3 loss)    | GLEWIGAIYPGNGDTSYN... | NH3 loss     | N55  | -0.43       | 100.0            | 1.1                                        | MS2 |
| 63    | Component | 8473 1:G44-K63 = 2182.0331m(N55+NH3 loss)    | GLEWIGAIYPGNGDTSYN... | NH3 loss     | N55  | -0.43       | 100.0            | 1.1                                        | MS2 |
| 64    | Component | 8474 1:G44-K63 = 2182.0331m(N55+NH3 loss)    | GLEWIGAIYPGNGDTSYN... | NH3 loss     | N55  | -0.43       | 100.0            | 1.1                                        | MS2 |
| 65    | Component | 8475 1:G44-K63 = 2182.0331m(N55+NH3 loss)    | GLEWIGAIYPGNGDTSYN... | NH3 loss     | N55  | -0.43       | 100.0            | 1.1                                        | MS2 |
| 66    | Component | 8476 1:G44-K63 = 2182.0331m(N55+NH3 loss)    | GLEWIGAIYPGNGDTSYN... | NH3 loss     | N55  | -0.43       | 100.0            | 1.1                                        | MS2 |
| 67    | Component | 8477 1:G44-K63 = 2182.0331m(N55+NH3 loss)    | GLEWIGAIYPGNGDTSYN... | NH3 loss     | N55  | -0.43       | 100.0            | 1.1                                        | MS2 |
| 68    | Component | 8478 1:G44-K63 = 2182.0331m(N55+NH3 loss)    | GLEWIGAIYPGNGDTSYN... | NH3 loss     | N55  | -0.43       | 100.0            | 1.1                                        | MS2 |
| 69    | Component | 8479 1:G44-K63 = 2182.0331m(N55+NH3 loss)    | GLEWIGAIYPGNGDTSYN... | NH3 loss     | N55  | -0.43       | 100.0            | 1.1                                        | MS2 |
| 70    | Component | 8480 1:G44-K63 = 2182.0331m(N55+NH3 loss)    | GLEWIGAIYPGNGDTSYN... | NH3 loss     | N55  | -0.43       | 100.0            | 1.1                                        | MS2 |
| 71    | Component | 8481 1:G44-K63 = 2182.0331m(N55+NH3 loss)    | GLEWIGAIYPGNGDTSYN... | NH3 loss     | N55  | -0.43       | 100.0            | 1.1                                        | MS2 |
| 72    | Component | 8482 1:G44-K63 = 2182.0331m(N55+NH3 loss)    | GLEWIGAIYPGNGDTSYN... | NH3 loss     | N55  | -0.43       | 100.0            | 1.1                                        | MS2 |
| 73    | Component | 8483 1:G44-K63 = 2182.0331m(N55+NH3 loss)    | GLEWIGAIYPGNGDTSYN... | NH3 loss     | N55  | -0.43       | 100.0            | 1.1                                        | MS2 |
| 74    | Component | 8484 1:G44-K63 = 2182.0331m(N55+NH3 loss)    | GLEWIGAIYPGNGDTSYN... | NH3 loss     | N55  | -0.43       | 100.0            | 1.1                                        | MS2 |
| 75    | Component | 8485 1:G44-K63 = 2182.0331m(N55+NH3 loss)    | GLEWIGAIYPGNGDTSYN... | NH3 loss     | N55  | -0.43       | 100.0            | 1.1                                        | MS2 |
| 76    | Component | 8486 1:G44-K63 = 2182.0331m(N55+NH3 loss)    | GLEWIGAIYPGNGDTSYN... | NH3 loss     | N55  | -0.43       | 100.0            | 1.1                                        | MS2 |
| 77    | Component | 8487 1:G44-K63 = 2182.0331m(N55+NH3 loss)    | GLEWIGAIYPGNGDTSYN... | NH3 loss     | N55  | -0.43       | 100.0            | 1.1                                        | MS2 |
| 78    | Component | 8488 1:G44-K63 = 2182.0331m(N55+NH3 loss)    | GLEWIGAIYPGNGDTSYN... | NH3 loss     | N55  | -0.43       | 100.0            | 1.1                                        | MS2 |
| 79    | Component | 8489 1:G44-K63 = 2182.0331m(N55+NH3 loss)    | GLEWIGAIYPGNGDTSYN... | NH3 loss     | N55  | -0.43       | 100.0            | 1.1                                        | MS2 |
| 80    | Component | 8490 1:G44-K63 = 2182.0331m(N55+NH3 loss)    | GLEWIGAIYPGNGDTSYN... | NH3 loss     | N55  | -0.43       | 100.0            | 1.1                                        | MS2 |
| 81    | Component | 8491 1:G44-K63 = 2182.0331m(N55+NH3 loss)    | GLEWIGAIYPGNGDTSYN... | NH3 loss     | N55  | -0.43       | 100.0            | 1.1                                        | MS2 |
| 82    | Component | 8492 1:G44-K63 = 2182.0331m(N55+NH3 loss)    | GLEWIGAIYPGNGDTSYN... | NH3 loss     | N55  | -0.43       | 100.0            | 1.1                                        | MS2 |
| 83    | Component | 8493 1:G44-K63 = 2182.0331m(N55+NH3 loss)    | GLEWIGAIYPGNGDTSYN... | NH3 loss     | N55  | -0.43       | 100.0            | 1.1                                        | MS2 |
| 84    | Component | 8494 1:G44-K63 = 2182.0331m(N55+NH3 loss)    | GLEWIGAIYPGNGDTSYN... | NH3 loss     | N55  | -0.43       | 100.0            | 1.1                                        | MS2 |
| 85    | Component | 8495 1:G44-K63 = 2182.0331m(N55+NH3 loss)    | GLEWIGAIYPGNGDTSYN... | NH3 loss     | N55  | -0.43       | 100.0            | 1.1                                        | MS2 |
| 86    | Component | 8496 1:G44-K63 = 2182.0331m(N55+NH3 loss)    | GLEWIGAIYPGNGDTSYN... | NH3 loss     | N55  | -0.43       | 100.0            | 1.1                                        | MS2 |
| 87    | Component | 8497 1:G44-K63 = 2182.0331m(N55+NH3 loss)    | GLEWIGAIYPGNGDTSYN... | NH3 loss     | N55  | -0.43       | 100.0            | 1.1                                        | MS2 |
| 88    | Component | 8498 1:G44-K63 = 2182.0331m(N55+NH3 loss)    | GLEWIGAIYPGNGDTSYN... | NH3 loss     | N55  | -0.43       | 100.0            | 1.1                                        | MS2 |
| 89    | Component | 8499 1:G44-K63 = 2182.0331m(N55+NH3 loss)    | GLEWIGAIYPGNGDTSYN... | NH3 loss     | N55  | -0.43       | 100.0            | 1.1                                        | MS2 |

# Stage 3: Data processing, analysis and reporting\_Step 16

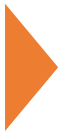

Save Peptide Workbook As

Enter a value between 1 and 10.

Create a New Peptide Workbook  Select an Existing Workbook

Workbook Name: MAM Discovery Phase Chimeric IgG1\_DP

Description:

Number of Isotopes per Peptide: 4

Save Cancel

# Stage 3: Data processing, analysis and reporting\_Step 17

The screenshot shows a software interface with a top navigation bar containing several menu items: Home, Peptide Mapping Analysis, Load Results, Queue, Parameters, Process and Review, Mapping, and Target Peptide Workbook. Below this is a 'Workbook Manager' section with a search bar and buttons for Edit, Export, and Import. A table lists workbooks with columns for Name, Category, Creation Date and Time, Last Modified Time, Number of Entities, Number of Groups, and Description. One workbook is listed: 'MAM Discovery Phase Chimeric IgG1\_DP' under the 'Targeted Peptide' category. A 'Save As' dialog box is open in the foreground, showing the file path 'This PC > OS (C:) > Xcalibur > data'. The file name is 'MAM Discovery Phase Chimeric IgG1\_DP\_peptide' and the save type is 'BioPharma Workbook (.wbpf)'. The dialog box also shows a list of folders on the left and a search bar at the top.

| Name                                 | Category         | Creation Date and Time | Last Modified Time  | Number of Entities | Number of Groups | Description |
|--------------------------------------|------------------|------------------------|---------------------|--------------------|------------------|-------------|
| MAM Discovery Phase Chimeric IgG1_DP | Targeted Peptide | 11/05/2021 11:52 AM    | 11/05/2021 12:44 PM | 80                 | 14               |             |

# Stage 3: Data processing, analysis and reporting\_Step 18

**ChimericIg DP vs BS\_SeqVariant**

| Name       | Type    | Level | Position | Volume | Instrument Method | Processing Method      | Status   | Inject Time              | Lock Status | Weight | Dilution | IntStd | Replicate ID | Comment | Re-injections | Spike G |
|------------|---------|-------|----------|--------|-------------------|------------------------|----------|--------------------------|-------------|--------|----------|--------|--------------|---------|---------------|---------|
| clgG1 DP_1 | Unknown |       | 0        | 1.0000 | MAM               | Proc Method_SeqVari... | Idle     |                          |             | 1.0000 | 1.0000   | 1.0000 |              |         | 0             |         |
| clgG1 DP_2 | Unknown |       |          | 1.0000 | MAM               | Proc Method_SeqVari... | Finished | 8/6/2020 3:15:56 PM +... |             | 1.0000 | 1.0000   | 1.0000 |              |         | 0             |         |
| clgG1 DP_3 | Unknown |       |          | 1.0000 | MAM               | Proc Method_SeqVari... | Finished | 8/6/2020 7:17:44 PM +... |             | 1.0000 | 1.0000   | 1.0000 |              |         | 0             |         |
| clgG1 BS_1 | Unknown |       |          | 1.0000 | MAM               | Proc Method_SeqVari... | Finished | 8/6/2020 11:19:32 PM...  |             | 1.0000 | 1.0000   | 1.0000 |              |         | 0             |         |
| clgG1 BS_2 | Unknown |       |          | 1.0000 | MAM               | Proc Method_SeqVari... | Finished | 8/7/2020 4:27:08 AM +... |             | 1.0000 | 1.0000   | 1.0000 |              |         | 0             |         |
| clgG1 BS_3 | Unknown |       |          | 1.0000 | MAM               | Proc Method_SeqVari... | Finished | 8/7/2020 8:29:08 AM +... |             | 1.0000 | 1.0000   | 1.0000 |              |         | 0             |         |
| clgG1 BS_3 | Unknown |       |          | 1.0000 | MAM               | Proc Method_SeqVari... | Finished | 8/7/2020 12:31:08 PM...  |             | 1.0000 | 1.0000   | 1.0000 |              |         | 0             |         |

  

**Create Processing Method**

Specify the layout and/or default settings of the new Processing Method by choosing a template or an existing Processing Method.

Choose a Processing Method template

**Processing Method Layout Templates**

- Basic Quantitative
- Quantitative
- 3D Quantitative
- MS.Quantitative...**
- Qualitative

**Default Processing Method Templates**

- 7-Anion Retention Time Std
- 6-Cation Retention Time Std

Choose existing Processing Method

More...

MAM Proc ...

Next >> Cancel

# Stage 3: Data processing, analysis and reporting\_Step 18

The screenshot displays the Proteome Discoverer interface during data processing. The left sidebar shows the workflow: Data Processing, Non-Targeted MS Processing, Intact Protein Deconvolution, and Report Designer. The main window is divided into several panels:

- Compound Data Import:** A table listing peptides and their isotopes. 63 out of 63 peptides are selected (540 isotopes).
- MS Component Table:** A table showing the results of MS detection for selected peptides.
- Chromatogram:** A plot of counts vs. time (min) showing a peak at RT=17.46 with an area of 2479079.
- Mass Spectrum:** A plot of relative intensity (%) vs. m/z for the peak at RT=17.46 min. The base peak is at m/z 987.0555.

**Compound Data Import Table:**

| Name                                     | RT    | Charge | PrecursorMass | Isotope 1  | Isotope 2  | Isotope 3  | Isotope 4  |
|------------------------------------------|-------|--------|---------------|------------|------------|------------|------------|
| VSNK                                     | 1.600 | 1      | 447.25620     | 447.25620  | 448.25900  | 449.26130  | 450.26360  |
| VSN[Deamidation]K                        | 1.967 | 1      | 448.24020     | 448.24020  | 449.24300  | 450.24530  | 451.24760  |
| EEM[Oxidation]TK                         | 2.156 | 1      | 653.28110     | 653.28110  | 654.28390  | 655.28270  | 656.28400  |
| C[Carboxymethylation]KVSNK               | 4.590 | 2      | 327.14420     | 327.14420  | 327.64560  | 328.14490  | 328.64560  |
| C[Carboxymethylation]KVS[N[Deamidation]K | 6.637 | 2      | 368.68650     | 368.68650  | 369.18790  | 369.68750  | 370.18800  |
| EEMTK                                    | 8.254 | 1      | 637.28620     | 637.28620  | 638.28900  | 639.28770  | 640.28900  |
| EEQYN[A2Ga2F]STYR                        | 9.290 | 2      | 1641.63220    | 1642.13380 | 1642.63520 | 1641.63220 | 1643.13670 |
| EEQYN[A3G3F]STYR                         | 9.298 | 3      | 1108.43280    | 1108.76710 | 1109.10140 | 1108.43280 | 1109.43570 |
| EEQYN[A2Ga1G1F]STYR                      | 9.363 | 2      | 1560.60580    | 1561.10730 | 1561.60880 | 1560.60580 | 1562.11020 |
| EEQYN[A2G0F]STYR                         | 9.374 | 2      | 1040.73960    | 1041.07400 | 1041.40830 | 1040.73960 | 1041.74250 |
| EEQYN[A2G2F]STYR                         | 9.374 | 2      | 1317.52660    | 1318.02810 | 1317.52660 | 1318.52950 | 1319.03090 |
| EEQYN[A3G2F]STYR                         | 9.381 | 2      | 878.68680     | 879.02120  | 878.68680  | 879.35540  | 879.68970  |
| EEQYN[A3G2F]STYR                         | 9.381 | 2      | 1581.11910    | 1581.62060 | 1582.12210 | 1581.11910 | 1582.62350 |
| EEQYN[A2G2F]STYR                         | 9.381 | 2      | 1054.41510    | 1054.74950 | 1055.08380 | 1054.41510 | 1055.41800 |
| EEQYN[A2G2F]STYR                         | 9.381 | 2      | 1479.57940    | 1480.08090 | 1480.58240 | 1479.57940 | 1481.08380 |

**MS Component Table:**

| #  | Name                  | Ret.Time | Window   | Ref.Mass.Spec. | Peak.Mass.Spec.Filter | Ref.Mass.Spec.Settings | Channel      | Eval.Type | Stand.Meth. | Cal.Type        | Conc.Unit |
|----|-----------------------|----------|----------|----------------|-----------------------|------------------------|--------------|-----------|-------------|-----------------|-----------|
| 46 | EEQYN[A1G1F]STYR      | 17.457   | 0.500 AG |                | Quantitation          | SI:0, RSI:0            | All Channels | Area      | External    | Lin, WithOffset | 1.        |
| 47 | (+3) EEQYN[A1G1F]STYR | 17.457   | 0.500 AG |                | Quantitation          | SI:0, RSI:0            | All Channels | Area      | External    | Lin, WithOffset | 1.        |
| 48 | EEQYN[A2G2F]STYR      | 17.472   | 0.500 AG |                | Quantitation          | SI:0, RSI:0            | All Channels | Area      | External    | Lin, WithOffset | 1.        |
| 49 | (+2) EEQYN[A2G2F]STYR | 17.472   | 0.500 AG |                | Quantitation          | SI:0, RSI:0            | All Channels | Area      | External    | Lin, WithOffset | 1.        |

# Stage 3: Data processing, analysis and reporting\_Step 19

The screenshot displays the Chromeleon Console interface. At the top, the window title is 'ChimericG DP vs BS\_SeqVariant'. Below the title bar is a menu bar with 'Create', 'File', 'Edit', 'View', 'Tools', and 'Help'. The main area shows a data table with the following columns: #, Name, Type, Date Modified, and Comment. The table contains four rows of data. Below the table, there are sections for 'Associated Items', 'Custom Sequence Variables (0)', and 'Custom Formulas'. On the left side, there is a sidebar with a tree view showing folders and files. At the bottom, there is a status bar with 'eWork' and other icons.

| # | Name                          | Type              | Date Modified                 | Comment |
|---|-------------------------------|-------------------|-------------------------------|---------|
| 1 | ChimericG DP vs BS_SeqVari... | Electronic Report | 11/10/2021 10:24:43 AM +01:00 |         |
| 2 | Default                       | View Settings     | 10/8/2020 10:04:03 AM +01:00  |         |
| 3 | MAM Processing Method View    | View Settings     | 11/6/2020 2:45:10 PM +00:00   |         |
| 4 | MAM Report IgG1BS CQAs_01     | Report Template   | 11/11/2021 5:19:53 PM +01:00  |         |

# Stage 3: Data processing, analysis and reporting\_Step 19

ChimericG DP vs BS\_SeqVariant (Sequence) - Chromeleon Chromatography Studio

**Data Processing**

**Injections**

- ChimericG1 DP\_1
- ChimericG1 DP\_2
- ChimericG1 DP\_3
- ChimericG1 BS\_1
- ChimericG1 BS\_2
- ChimericG1 BS\_3

**Channels**

- MS Quantitation
- TIC

**Components (18 of 151)**

- PKDTLMISR
- (+3) PKDTLMISR
- DTLM[Oxidation]ISR
- (+2) DTLM[Oxidation]ISR
- (+1) DTLM[Oxidation]ISR
- DTLMISR
- (+2) DTLMISR
- (+1) DTLMISR
- GLEWIGAIYPGNGDTSYNQK
- (+3) GLEWIGAIYPGNGDTSYNQK
- (+4) GLEWIGAIYPGNGDTSYNQK
- (+2) GLEWIGAIYPGNGDTSYNQK
- GLEWIGAIYPGN[Deamidation]GDSYNQK
- (+2) GLEWIGAIYPGN[Deamidation]GDSYNQK
- (+3) GLEWIGAIYPGN[Deamidation]GDSYNQK
- GLEWIGAIYPGN[NH3 loss]GDSYNQK
- (+2) GLEWIGAIYPGN[NH3 loss]GDSYNQK

**Chromatogram**

5 - ChimericG DP vs BS\_SeqVariant #1 [manually integrated] RT=59.91; Area=4477872834.

4 - ChimericG DP vs BS\_SeqVariant #1 RT=59.91; Area=1448967649.

3 - ChimericG DP vs BS\_SeqVariant #1 RT=59.91; Area=1237427799.

2 - ChimericG DP vs BS\_SeqVariant #1 RT=59.91; Area=946862085.

1 - ChimericG DP vs BS\_SeqVariant #1 RT=59.87; Area=435775970.

**Mass Spectra**

Apex GLEWIGAIYPGNGDTSYNQK Scan: #5626 RT: 59.91 min NL: 9.99E+007 Apex

FTMS + p ESI Full ms [200.0000-2000.0000]

728.6844, 728.3510, 729.0180, 1092.5201, 1092.0193, 1093.0212, 649.6789, 650.0128, 974.0154, 974.5166, 1093.6227

**Component Table**

| #   | Name                                     | Ret.Time                             | Window   | Ref.Mass.Spec. | Peak.Mass.Spec.Filter | Het.Mass.Spec.Settings | Channel      | Eval.Type | Stand.Meth. | Cal.Type        | Conc.Unit |
|-----|------------------------------------------|--------------------------------------|----------|----------------|-----------------------|------------------------|--------------|-----------|-------------|-----------------|-----------|
| 123 | (+2) GFYPSDIAVEWESNGQPENNYK              | 58.000                               | 0.500 AG |                | Quantitation          | SI:0, RSI:0            | All Channels | Area      | External    | Lin, WithOffset |           |
| 124 | GFYPSDIAVEWESNGQPEN[Deamidation]NYK      | GFYPSDIAVEWESNGQPENNYK @ 0.600 [min] | 0.600 AG |                | Quantitation          | SI:0, RSI:0            | All Channels | Area      | External    | Lin, WithOffset |           |
| 125 | (+2) GFYPSDIAVEWESNGQPEN[Deamidation]NYK | GFYPSDIAVEWESNGQPENNYK @ 0.600 [min] | 0.600 AG |                | Quantitation          | SI:0, RSI:0            | All Channels | Area      | External    | Lin, WithOffset |           |
| 126 | (+3) GFYPSDIAVEWESNGQPEN[Deamidation]NYK | GFYPSDIAVEWESNGQPENNYK @ 0.600 [min] | 0.600 AG |                | Quantitation          | SI:0, RSI:0            | All Channels | Area      | External    | Lin, WithOffset |           |
| 127 | GFYPSDIAVEWESN[NH3 loss]GQPENNYK         | GFYPSDIAVEWESNGQPENNYK @ 1.600 [min] | 0.600 AG |                | Quantitation          | SI:0, RSI:0            | All Channels | Area      | External    | Lin, WithOffset |           |
| 128 | (+2) GFYPSDIAVEWESN[NH3 loss]GQPENNYK    | GFYPSDIAVEWESNGQPENNYK @ 1.600 [min] | 0.600 AG |                | Quantitation          | SI:0, RSI:0            | All Channels | Area      | External    | Lin, WithOffset |           |
| 129 | (+3) GFYPSDIAVEWESN[NH3 loss]GQPENNYK    | GFYPSDIAVEWESNGQPENNYK @ 1.600 [min] | 0.600 AG |                | Quantitation          | SI:0, RSI:0            | All Channels | Area      | External    | Lin, WithOffset |           |
| 130 | GLEWIGAIYPGNGDTSYNQK                     | 59.990                               | 0.500 AG |                | Quantitation          | SI:0, RSI:0            | All Channels | Area      | External    | Lin, WithOffset |           |
| 131 | (+3) GLEWIGAIYPGNGDTSYNQK                | 59.990                               | 0.500 AG |                | Quantitation          | SI:0, RSI:0            | All Channels | Area      | External    | Lin, WithOffset |           |



# Stage 3: Data processing, analysis and reporting\_Step 20

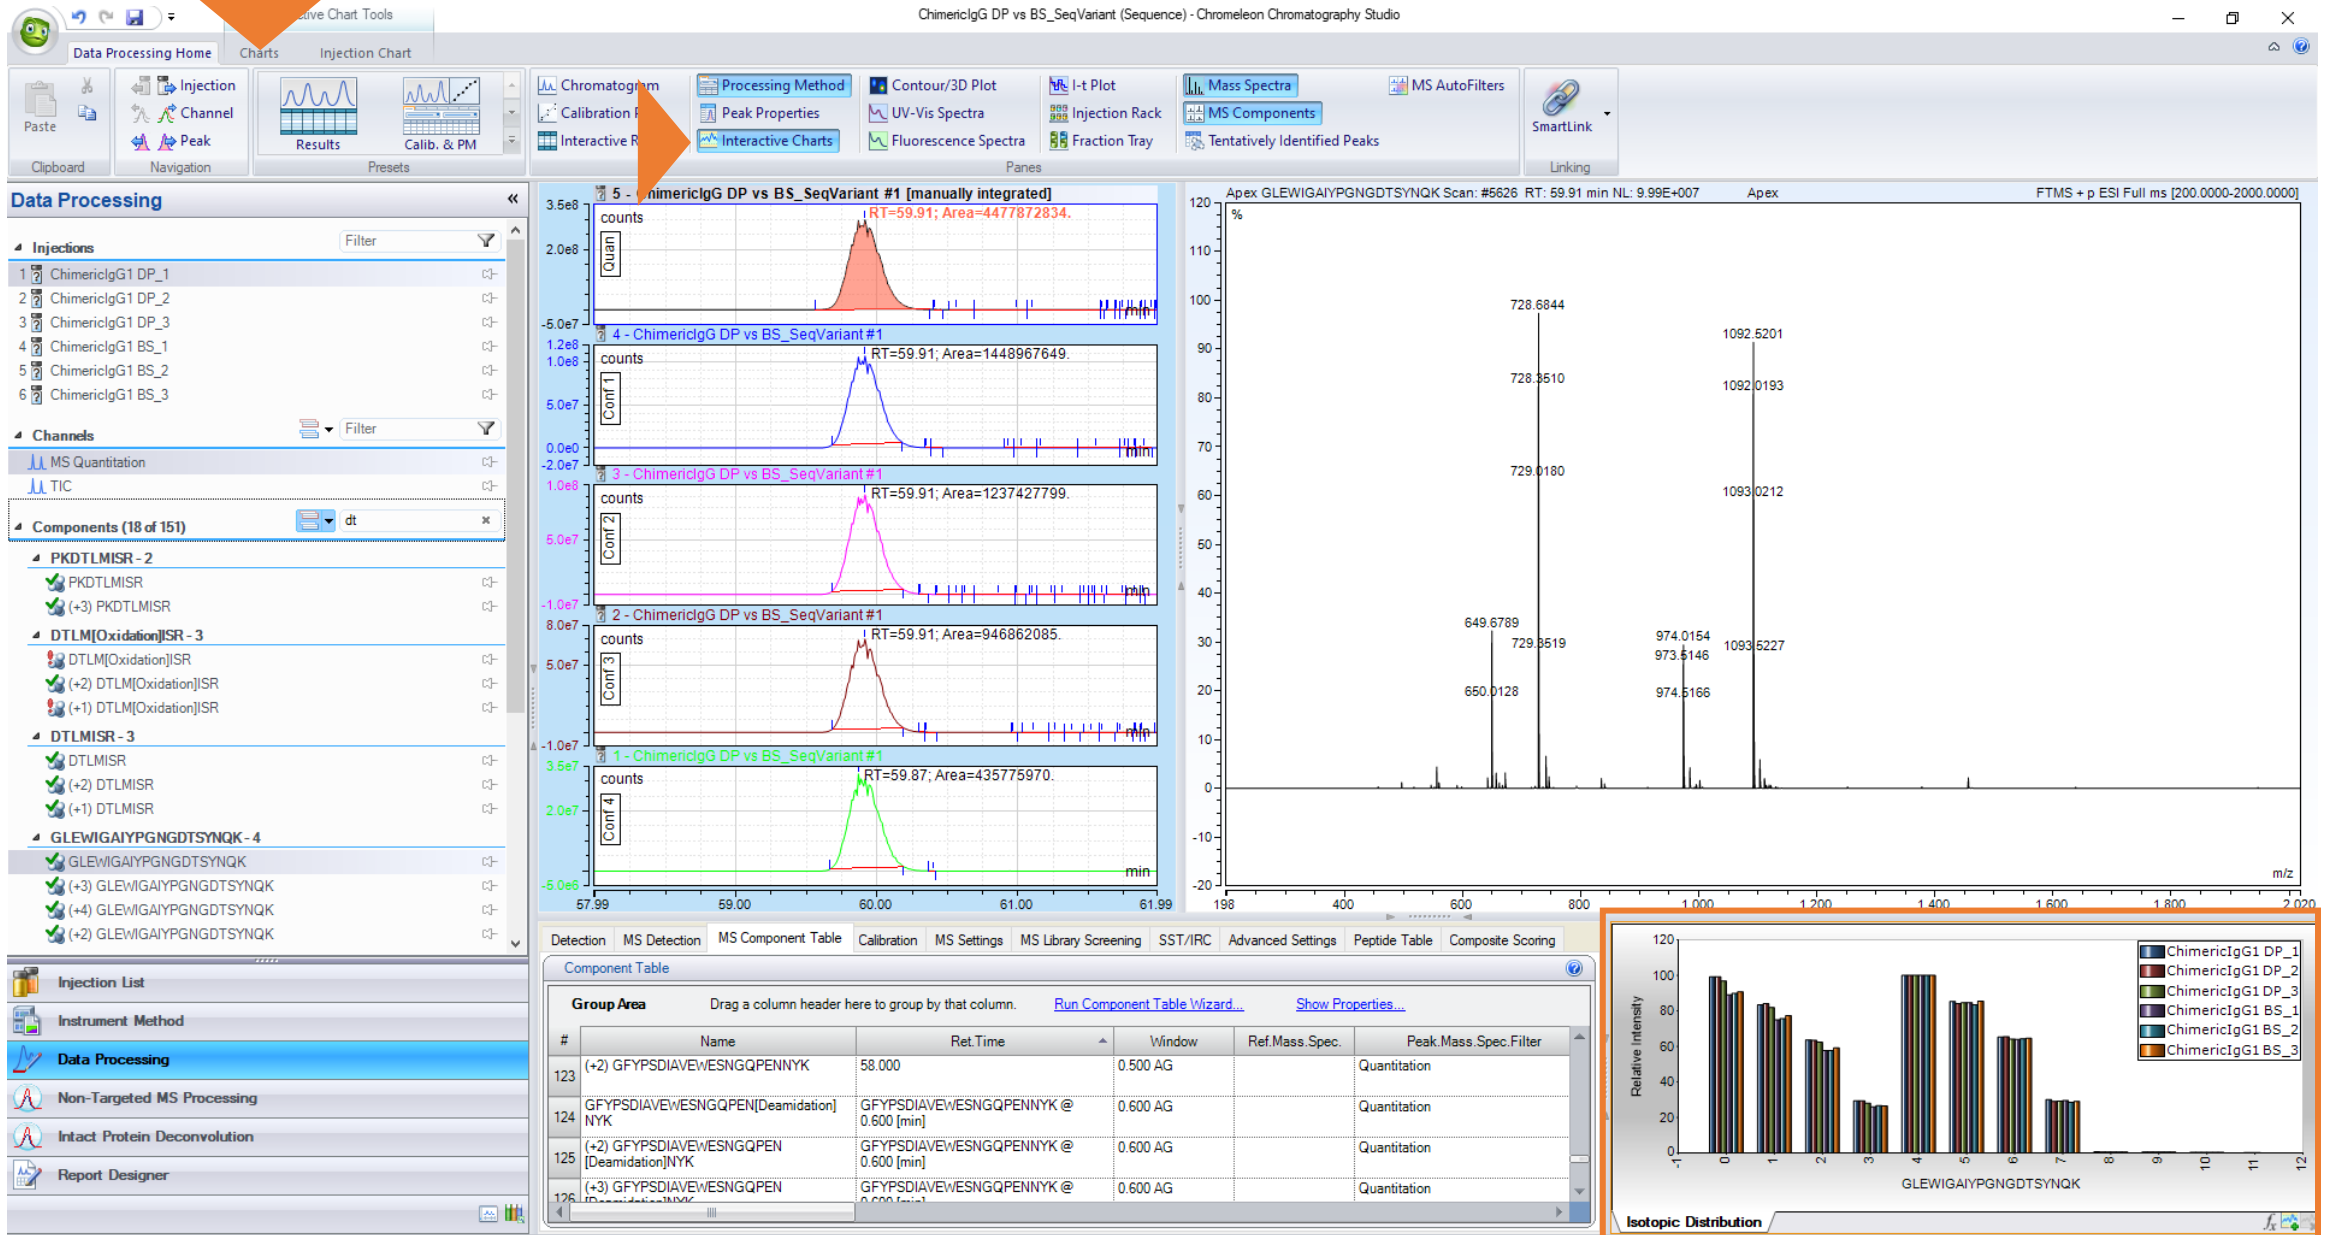

# Stage 3: Data processing, analysis and reporting\_Step 21-24

ChimericG DP vs BS\_SeqVariant (Sequence) - Chromeleon Chromatography Studio

Home | Processing | Chromatogram Plot | Start | Idle | Score All Injections

Clipboard | Navigation | Panes | Processing | Status | Scoring

### Non-Targeted MS Processing

**Injections**

- ChimericG1 DP\_1
- ChimericG1 DP\_2
- ChimericG1 DP\_3
- ChimericG1 BS\_1
- ChimericG1 BS\_2
- ChimericG1 BS\_3

**Channels**

- Aligned Base Peak
- Reference Base Peak
- Unaligned Base Peak

**Frames**

**Processing Methods**

- MAM Proc Method\_SeqVariant\_01

Processing Method: Alignment Detection

Reference Injection:  Relative 1  Fixed

Frame Parameters:

- m/z Min: 200.00
- m/z Max: 1,800.00
- m/z Width [ppm]: 10.00
- Retention Time Start [min]: 1.00
- Retention Time Stop [min]: 90.00
- Frame Time Width [min]: 1.00
- Maximum Number of Frames: 5,000
- Peak Intensity Threshold:  Fixed 1,000,000  Auto-compute
- Scan Filter(s): TIC

Start

Advanced... Reset

No results found.

|    | A                   | B            | C    | D   | E     | F              | G          | H       | I       | J      | K                | L | M | N | O | P | Q | R |
|----|---------------------|--------------|------|-----|-------|----------------|------------|---------|---------|--------|------------------|---|---|---|---|---|---|---|
| 1  | Frame ID            | Component ID | Mass | RT  | Ratio | Base Component | PR Element | PR Root | PR Size | Charge | Molecular Weight |   |   |   |   |   |   |   |
| 2  |                     |              | m/z  | min |       |                |            |         |         |        | m/z              |   |   |   |   |   |   |   |
| 5  | There are no frames |              |      |     |       |                |            |         |         |        |                  |   |   |   |   |   |   |   |
| 6  |                     |              |      |     |       |                |            |         |         |        |                  |   |   |   |   |   |   |   |
| 7  |                     |              |      |     |       |                |            |         |         |        |                  |   |   |   |   |   |   |   |
| 8  |                     |              |      |     |       |                |            |         |         |        |                  |   |   |   |   |   |   |   |
| 9  |                     |              |      |     |       |                |            |         |         |        |                  |   |   |   |   |   |   |   |
| 10 |                     |              |      |     |       |                |            |         |         |        |                  |   |   |   |   |   |   |   |
| 11 |                     |              |      |     |       |                |            |         |         |        |                  |   |   |   |   |   |   |   |
| 12 |                     |              |      |     |       |                |            |         |         |        |                  |   |   |   |   |   |   |   |
| 13 |                     |              |      |     |       |                |            |         |         |        |                  |   |   |   |   |   |   |   |
| 14 |                     |              |      |     |       |                |            |         |         |        |                  |   |   |   |   |   |   |   |
| 15 |                     |              |      |     |       |                |            |         |         |        |                  |   |   |   |   |   |   |   |
| 16 |                     |              |      |     |       |                |            |         |         |        |                  |   |   |   |   |   |   |   |
| 17 |                     |              |      |     |       |                |            |         |         |        |                  |   |   |   |   |   |   |   |
| 18 |                     |              |      |     |       |                |            |         |         |        |                  |   |   |   |   |   |   |   |
| 19 |                     |              |      |     |       |                |            |         |         |        |                  |   |   |   |   |   |   |   |
| 20 |                     |              |      |     |       |                |            |         |         |        |                  |   |   |   |   |   |   |   |

Injection List | Instrument Method | Data Processing | **Non-Targeted MS Processing** | Intact Protein Deconvolution | Report Designer

Frame Table | Frame Filter

# Stage 3: Data processing, analysis and reporting\_Step 25-26

ChimericG DP vs BS\_SeqVariant (Sequence) - Chromeleon Chromatography Studio

Home | Injection | Processing | Chromatogram Plot | Start | Start All | Idle | Score All Injections

Clipboard | Navigation | Panes | Processing | Status | Scoring

### Non-Targeted MS Processing

**Injections**

- 1 ChimericG1 DP\_1
- 2 ChimericG1 DP\_2
- 3 ChimericG1 DP\_3
- 4 ChimericG1 BS\_1
- 5 ChimericG1 BS\_2
- 6 ChimericG1 BS\_3

**Channels**

- Aligned Base Peak
- Reference Base Peak
- Unaligned Base Peak

**Frames**

**Processing Methods**

- MAM Proc Method\_SeqVariant\_01

Reference Injection:  Relative 1  Fixed

Frame Parameters:

- m/z Min: 200.00
- m/z Max: 1,800.00
- m/z Width [ppm]: 10.00
- Retention Time Start [min]: 1.00
- Retention Time Stop [min]: 90.00
- Frame Time Width [min]: 1.00
- Maximum Number of Frames: 5,000
- Peak Intensity Threshold:  Fixed 1,000,000  Auto-compute TIC 0.00 %

Scan Filter(s):

Advanced... Reset

No results found.

|   | A                   | B            | C    | D   | E     | F              | G          | H       | I       | J      | K                | L | M | N | O | P | Q | R |
|---|---------------------|--------------|------|-----|-------|----------------|------------|---------|---------|--------|------------------|---|---|---|---|---|---|---|
| 1 | Frame ID            | Component ID | Mass | RT  | Ratio | Base Component | PR Element | PR Root | PR Size | Charge | Molecular Weight |   |   |   |   |   |   |   |
| 2 |                     |              | m/z  | min |       |                |            |         |         |        | m/z              |   |   |   |   |   |   |   |
| 5 | There are no frames |              |      |     |       |                |            |         |         |        |                  |   |   |   |   |   |   |   |

Frame Filter

Match ALL of the following rules:

- PR Element = 0
- PR Size > 1
- Charge is between 1 and 2
- Ratio > 1000.00000

and

Injection List | Instrument Method | Data Processing | **Non-Targeted MS Processing** | Intact Protein Deconvolution | Report Designer

# Stage 3: Data processing, analysis and reporting\_Step 27

Home

Select an experiment type.

**Experiment Types**

- Sequence Manager >
- Peptide Mapping Analysis >
- Oligonucleotide Analysis >
- Intact Mass Analysis >
- Top Down Analysis >

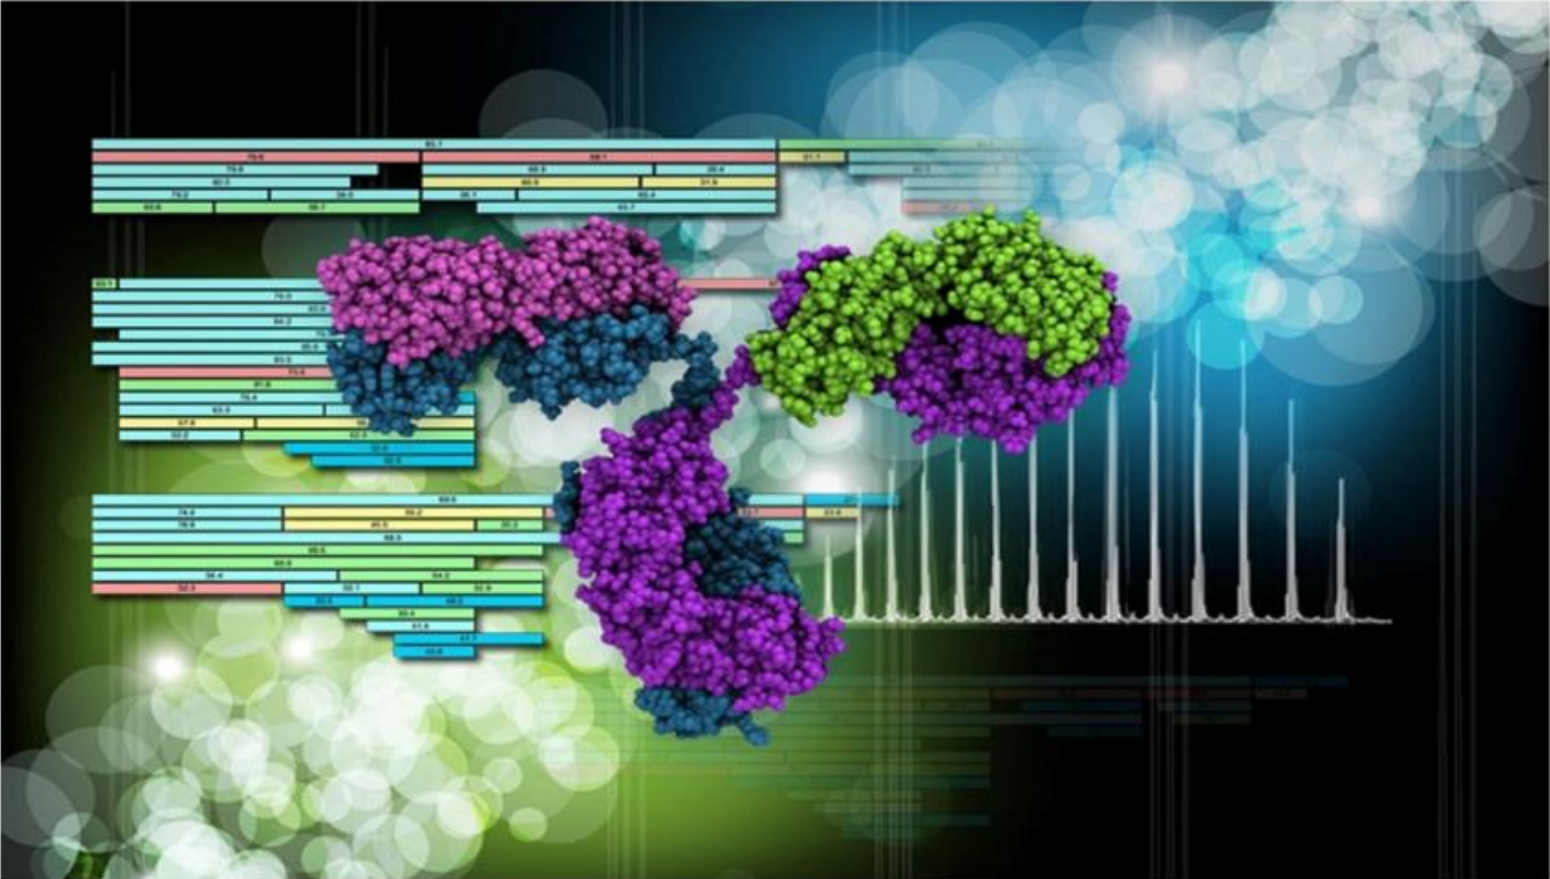

Peptide Mapping Analysis      Oligonucleotide Analysis      Intact Mass Analysis      Top Down Analysis

# Stage 3: Data processing, analysis and reporting\_Step 28

The screenshot shows the Chromeleon Console interface. The 'Data' menu is open, with 'Report Template...' selected. The 'New Report Template' dialog box is displayed, showing a list of default templates under 'Thermo Scientific Templates'. The 'Empty Template' option is highlighted with a blue box. An orange arrow points from the 'Report Template...' menu item to the dialog box. Another orange arrow points from the 'Empty Template' box to the right. The background shows a data table with columns: Type, Level, Position, Volume, Instrument Method, Processing Method, Status, Inject Time, Lock Status, Weight, Dilution, IntStd, Replicate ID, Comment, Re-injections, and Spike G.

| Type             | Level   | Position | Volume | Instrument Method | Processing Method      | Status   | Inject Time              | Lock Status | Weight | Dilution | IntStd | Replicate ID | Comment | Re-injections | Spike G |
|------------------|---------|----------|--------|-------------------|------------------------|----------|--------------------------|-------------|--------|----------|--------|--------------|---------|---------------|---------|
| ChimericIgG DP_1 | Unknown |          | 1.0000 | MAM               | Proc Method_SeqVari... | Finished | 8/6/2020 3:15:56 PM +... |             | 1.0000 | 1.0000   | 1.0000 |              |         | 0             |         |
| ChimericIgG DP_2 | Unknown |          | 1.0000 | MAM               | Proc Method_SeqVari... | Finished | 8/6/2020 7:17:44 PM +... |             | 1.0000 | 1.0000   | 1.0000 |              |         | 0             |         |
| ChimericIgG DP_3 | Unknown |          | 1.0000 | MAM               | Proc Method_SeqVari... | Finished | 8/6/2020 11:19:32 PM...  |             | 1.0000 | 1.0000   | 1.0000 |              |         | 0             |         |
| ChimericIgG BS_1 | Unknown |          | 1.0000 | MAM               | Proc Method_SeqVari... | Finished | 8/7/2020 4:27:08 AM +... |             | 1.0000 | 1.0000   | 1.0000 |              |         | 0             |         |
| ChimericIgG BS_2 | Unknown |          | 1.0000 | MAM               | Proc Method_SeqVari... | Finished | 8/7/2020 8:22:06 AM...   |             | 1.0000 | 1.0000   | 1.0000 |              |         | 0             |         |
| ChimericIgG BS_3 | Unknown |          | 1.0000 | MAM               | Proc Method_SeqVari... | Finished | 8/7/2020 8:22:06 AM...   |             | 1.0000 | 1.0000   | 1.0000 |              |         | 0             |         |

# Stage 3: Data processing, analysis and reporting\_Step 29-32

ChimericIg DP vs BS\_SeqVariant (Sequence) - Chromeleon Chromatography Studio

Home Insert Page Layout

Blank All Sheets... Integration Peak Summary All Tables... Sequence Injection Chromatogram All Variables... Chromatogram Calibration All Plots... Retention Time Column Performance All Charts... Line Column All Charts... Picture Shapes

Sheets Report Tables Report Variables Plots Result Charts General Charts Illustrations

### Report Designer

- (+5) WQQGNVFSC[Carboxymethylation]SVMHEALHNHYTQKSLSPG
- SSSTAYM[Oxidation]QLSSLTSEDSAVYYC[Carboxymethylation]AR
- (+3) SSSTAYM[Oxidation]QLSSLTSEDSAVYYC[Carboxymethylation]AR
- SSSTAYM[Oxidation]QLSSLTSEDSAVYYC[Carboxymethylation]AR
- (+3) SSSTAYM[Oxidation]QLSSLTSEDSAVYYC[Carboxymethylation]AR
- SSSTAYMQLSSLTSEDSAVYYC[Carboxymethylation]AR
- (+2) SSSTAYMQLSSLTSEDSAVYYC[Carboxymethylation]AR
- (+3) SSSTAYMQLSSLTSEDSAVYYC[Carboxymethylation]AR
- (+4) SSSTAYMQLSSLTSEDSAVYYC[Carboxymethylation]AR
- GFYPSDIAVEWESNGQPENNYK
- (+3) GFYPSDIAVEWESNGQPENNYK
- (+4) GFYPSDIAVEWESNGQPENNYK
- (+2) GFYPSDIAVEWESNGQPENNYK
- GFYPSDIAVEWESNGQPEN[Deamidation]NYK
- (+2) GFYPSDIAVEWESNGQPEN[Deamidation]NYK
- (+3) GFYPSDIAVEWESNGQPEN[Deamidation]NYK
- GFYPSDIAVEWESN[NH3 loss]GQPENNYK
- (+2) GFYPSDIAVEWESN[NH3 loss]GQPENNYK
- (+3) GFYPSDIAVEWESN[NH3 loss]GQPENNYK
- GLEWIGAIYPGNGDTSYNQK
- (+3) GLEWIGAIYPGNGDTSYNQK
- (+4) GLEWIGAIYPGNGDTSYNQK
- (+2) GLEWIGAIYPGNGDTSYNQK
- GLEWIGAIYPGN[Deamidation]GDTSYNQK
- (+2) GLEWIGAIYPGN[Deamidation]GDTSYNQK
- (+3) GLEWIGAIYPGN[Deamidation]GDTSYNQK
- GLEWIGAIYPGN[NH3 loss]GDTSYNQK
- (+2) GLEWIGAIYPGN[NH3 loss]GDTSYNQK
- (+3) GLEWIGAIYPGN[NH3 loss]GDTSYNQK

Report Templates

- MAM Report IgG1BS CQAs\_01
- MAM Report SeqVariant\_01

Injection List

Instrument Method

Data Processing

Non-Targeted MS Processing

Intact Protein Deconvolution

Report Designer

B43

|    | A                          | B                 | C                              | D       | E                 | F                 | G                                            | H        | I           | J | K            |  |
|----|----------------------------|-------------------|--------------------------------|---------|-------------------|-------------------|----------------------------------------------|----------|-------------|---|--------------|--|
| 1  | Sequence Overview          |                   |                                |         |                   |                   |                                              |          |             |   |              |  |
| 2  |                            |                   |                                |         |                   |                   |                                              |          |             |   |              |  |
| 3  | Sequence details           |                   |                                |         |                   |                   |                                              |          |             |   |              |  |
| 4  | Name:                      |                   | ChimericIg DP vs BS_SeqVariant |         |                   |                   |                                              |          | Created on: |   | 8/27/2020    |  |
| 5  | Instrument:                |                   |                                |         |                   |                   |                                              |          | Updated on: |   |              |  |
| 6  | Imported data:             |                   | True                           |         |                   |                   |                                              |          |             |   |              |  |
| 7  | First Injection:           |                   |                                |         |                   |                   |                                              |          |             |   |              |  |
| 8  | Processing Method:         |                   | MAM                            |         |                   |                   |                                              |          |             |   |              |  |
| 9  | MS Acquisition Time (min): |                   | 120.02                         |         |                   |                   |                                              |          |             |   |              |  |
| 10 |                            |                   |                                |         |                   |                   |                                              |          |             |   |              |  |
| 11 | DataVault:                 |                   | ChromeleonLocal                |         |                   |                   |                                              |          | Created by: |   | Sivia Millán |  |
| 12 | Number of Injections:      |                   | 6                              |         |                   |                   |                                              |          | Updated by: |   |              |  |
| 13 |                            |                   |                                |         |                   |                   |                                              |          |             |   |              |  |
| 14 |                            |                   |                                |         |                   |                   |                                              |          |             |   |              |  |
| 15 |                            |                   |                                |         |                   |                   |                                              |          |             |   |              |  |
| 16 |                            |                   |                                |         |                   |                   |                                              |          |             |   |              |  |
| 17 | No.                        | Injection Name    | Position                       | Type    | Instrument Method | Processing Method | Inject Time                                  | Status   |             |   |              |  |
| 18 |                            |                   |                                |         |                   |                   |                                              |          |             |   |              |  |
| 19 |                            |                   |                                |         |                   |                   |                                              |          |             |   |              |  |
| 20 |                            |                   |                                |         |                   |                   |                                              |          |             |   |              |  |
| 21 | 1                          | ChimericIgG1 DP 1 |                                | Unknown | n.a.              | MAM               | Proc Method SeqVariant_01 06/Aug/20 15:15:56 | Finished |             |   |              |  |
| 22 | 2                          | ChimericIgG1 DP 2 |                                | Unknown | n.a.              | MAM               | Proc Method SeqVariant_01 06/Aug/20 19:17:44 | Finished |             |   |              |  |
| 23 | 3                          | ChimericIgG1 DP 3 |                                | Unknown | n.a.              | MAM               | Proc Method SeqVariant_01 06/Aug/20 23:19:32 | Finished |             |   |              |  |
| 24 | 4                          | ChimericIgG1 BS 1 |                                | Unknown | n.a.              | MAM               | Proc Method SeqVariant_01 07/Aug/20 04:27:08 | Finished |             |   |              |  |
| 25 | 5                          | ChimericIgG1 BS 2 |                                | Unknown | n.a.              | MAM               | Proc Method SeqVariant_01 07/Aug/20 08:29:08 | Finished |             |   |              |  |
| 26 | 6                          | ChimericIgG1 BS 3 |                                | Unknown | n.a.              | MAM               | Proc Method SeqVariant_01 07/Aug/20 12:31:08 | Finished |             |   |              |  |
| 27 |                            |                   |                                |         |                   |                   |                                              |          |             |   |              |  |
| 28 |                            |                   |                                |         |                   |                   |                                              |          |             |   |              |  |
| 29 |                            |                   |                                |         |                   |                   |                                              |          |             |   |              |  |
| 30 |                            |                   |                                |         |                   |                   |                                              |          |             |   |              |  |
| 31 |                            |                   |                                |         |                   |                   |                                              |          |             |   |              |  |
| 32 |                            |                   |                                |         |                   |                   |                                              |          |             |   |              |  |
| 33 |                            |                   |                                |         |                   |                   |                                              |          |             |   |              |  |
| 34 |                            |                   |                                |         |                   |                   |                                              |          |             |   |              |  |
| 35 |                            |                   |                                |         |                   |                   |                                              |          |             |   |              |  |
| 36 |                            |                   |                                |         |                   |                   |                                              |          |             |   |              |  |
| 37 |                            |                   |                                |         |                   |                   |                                              |          |             |   |              |  |
| 38 |                            |                   |                                |         |                   |                   |                                              |          |             |   |              |  |
| 39 |                            |                   |                                |         |                   |                   |                                              |          |             |   |              |  |
| 40 |                            |                   |                                |         |                   |                   |                                              |          |             |   |              |  |
| 41 |                            |                   |                                |         |                   |                   |                                              |          |             |   |              |  |
| 42 |                            |                   |                                |         |                   |                   |                                              |          |             |   |              |  |
| 43 |                            |                   |                                |         |                   |                   |                                              |          |             |   |              |  |
| 44 |                            |                   |                                |         |                   |                   |                                              |          |             |   |              |  |

< > Sequence Overview / Oxidation / Deamidation-Succinimide formation / N-Glycosylation / Composite Scoring / NPD / <

# Stage 3: Data processing, analysis and reporting\_Step 33

The screenshot displays the Chromeleon Chromatography Studio interface. The main window title is "ChimericG DP vs BS\_SeqVariant (Sequence) - Chromeleon Chromatography Studio". The interface includes a top toolbar with options like "Print", "Page Setup", "Navigation", "Page Setup", "Autorepeat", "Scale to Fit", "Zoom", and "Close".

The left sidebar shows the "Report Designer" section with a list of report templates. The "Report Templates" section is expanded, showing two templates: "MAM Report IgG1BS CQAs\_01" and "MAM Report SeqVariant\_01".

The main workspace is divided into two panes. The left pane shows a list of peptide sequences with their corresponding injection numbers and modifications. The right pane shows the "Sequence Overview" report, which includes a table with the following data:

| Sequence Overview          |                                          |                          |
|----------------------------|------------------------------------------|--------------------------|
| Name:                      | ChimericG DP vs BS_SeqVariant            | Created on: 8/2/2020     |
| Instrument:                | True                                     | Updated on:              |
| Injection:                 | True                                     |                          |
| Processing Method:         | MAM (RuminAb Proc Method, SeqVariant_01) |                          |
| MS Acquisition Time (min): | 125.02                                   |                          |
| Default:                   | Chromatogram                             | Created by: Steve Miller |
| Number of Injections:      | 6                                        | Updated by:              |

The "Print" dialog box is open, showing the "Apply to" section with "Current Injection" selected. The "Printer" is set to "Microsoft Print to PDF". The "Select sheets to be printed" section contains a table with the following data:

| Sheet Name               | Print                               |
|--------------------------|-------------------------------------|
| Sequence Overview        | <input checked="" type="checkbox"/> |
| Oxidation                | <input checked="" type="checkbox"/> |
| Deamidation-Succinimi... | <input checked="" type="checkbox"/> |
| N-Glycosylation          | <input checked="" type="checkbox"/> |
| Composite Scoring        | <input checked="" type="checkbox"/> |
| NPD                      | <input checked="" type="checkbox"/> |

The bottom status bar shows the current report view: "Sequence Overview | Oxidation | Deamidation-Succinimide formation | N-Glycosylation | Composite Scoring | NPD".
